# 1 **Optogenetic interrogation of the role of striatal patches in habit** 2 **formation and inhibition of striatal dopamine**

3  
4 **Authors:** Nadel, J.A.<sup>1,\*</sup>, Pawelko S.S.<sup>1,\*</sup>, Scott J.R.<sup>1</sup>, McLaughlin, R.<sup>1</sup>, Fox M.<sup>1</sup>, Hollon, N.G.<sup>2</sup>,  
5 Howard, C.D.<sup>1,#</sup>

6  
7 \*These authors contributed equally to this work

8  
9 #Corresponding Author

10 Email: [choward@oberlin.edu](mailto:choward@oberlin.edu)

11  
12 <sup>1</sup> Neuroscience Department, Oberlin College, 173 Lorain St., Oberlin, OH, USA

13 <sup>2</sup> Molecular Neurobiology Laboratory, The Salk Institute for Biological Studies, 10010 North  
14 Torrey Pines Road, La Jolla, CA 92037, USA.

## 15 16 **Abstract**

17 Habits are inflexible behaviors that can be maladaptive in diseases including drug addiction. The  
18 striatum is integral to habit formation, and interspersed throughout the striatum are patches, or  
19 striosomes, which are characterized by unique gene expression relative to the surrounding matrix.  
20 Recent work has indicated that patches are necessary for habit formation, but how patches  
21 contribute to habits remains partially understood. Here, using optogenetics, we modulated striatal  
22 patches in Sepw1-NP67 mice during habit formation. We find that patch activation during operant  
23 training impairs habit formation, and conversely, that acute patch stimulation after reward  
24 devaluation can drive habitual reward seeking. Patch stimulation invigorates general locomotion  
25 but is not inherently rewarding. Finally, we use fast-scan cyclic voltammetry to demonstrate that  
26 patch stimulation suppresses dopamine release in dorsal striatum *in vivo*. Overall, this work  
27 provides novel insight into the role of the patch compartment in habit formation, and potential  
28 interactions with dopamine signaling.

## 29 Introduction

30 Organisms must optimize action patterns to be successful in their environments. This  
31 optimization process can come in two forms: updating of actions can be highly flexible and  
32 dependent on outcomes (so-called action-outcome, or goal-oriented behaviors) or, with extended  
33 training, action updating can become resistant to change regardless of outcome (stimulus-response  
34 or habitual behaviors; Dolan and Dayan, 2013). Habitual, automated behaviors can be highly  
35 advantageous, as they allow animals to respond to stimuli without great cognitive effort. However,  
36 habits can also present as maladaptive behaviors that persist in spite of negative outcomes.  
37 Moreover, dysfunctional habit formation underlies many pathological states, including drug  
38 addiction (Robbins and Everitt, 1999).

39 In animal models, habits have been studied by measuring perseverance of instrumental  
40 behaviors following reduction in reward value or by measuring flexibility when action-outcome  
41 contingencies are manipulated (Adams and Dickinson, 1981; Dickinson, 1985; Rossi and Yin,  
42 2012). Using these approaches, distinct neural circuits underlying goal-directed and habitual  
43 responding have been identified. A well supported model has emerged positing that the  
44 dorsomedial striatum encodes goal-directed behaviors, while the dorsolateral striatum encodes  
45 habitual behaviors (Yin et al., 2005, 2004; Yin and Knowlton, 2006). Similarly, corticostriatal  
46 plasticity in the lateral striatum correlates with habitual responding (O'Hare et al., 2016), and  
47 human imaging studies have linked activity in lateral striatum (putamen) with habitual behaviors  
48 (Tricomi et al., 2009). However, this model could be somewhat oversimplified, as other studies  
49 suggest medial striatum could also contribute to inflexible behaviors (Malvaez et al., 2018; Seiler  
50 et al., 2020).

51 Adding a layer of complexity to the medial-lateral striatal divide is the existence of two  
52 neurochemically distinct subcompartments: small, labyrinthine islands called patches or  
53 striosomes (comprising 15% of striatal volume), and surrounding 'matrix' tissue (85% of striatal  
54 volume; Gerfen, 1992; Graybiel and Ragsdale, 1978). In addition to unique cellular markers  
55 (Crittenden and Graybiel, 2011), patches are characterized by unique connectivity, providing the  
56 predominant anatomical and functional striatal input to midbrain dopaminergic neurons (Evans et  
57 al., 2020; Gerfen, 1985). Additionally, habenula-projecting neurons of the entopeduncular nucleus  
58 receive preferential input from patches (Stephenson-Jones et al., 2016; Wallace et al., 2017).  
59 Striatal patches also have unique input profiles, with preferential inputs from frontal cortex (Eblen  
60 and Graybiel, 1995; Gerfen, 1984; but see Smith et al., 2016). Therefore, striatal patches are well-  
61 positioned to serve as a limbic-motor interface that could subserve action selection (Shivkumar et  
62 al., 2017).

63 Despite extensive work characterizing the structure and connectivity of striatal patches,  
64 their role in behavior regulation is only partially understood. Studies have suggested a role for  
65 striatal patches in reward processing (Bloem et al., 2017; White and Hiroi, 1998; Yoshizawa et al.,  
66 2018) and cost-benefit decision making (Friedman et al., 2017, 2015). Additionally, several studies  
67 now support the notion that patches may encode the transition from flexible to habitual responding.  
68 Early studies suggested that psychostimulant-induced stereotypy is linked to activity in patches

69 (Canales and Graybiel, 2000; Murray et al., 2015, 2014) and that lesions of patches disrupt this  
70 stereotypy (Murray et al., 2015, 2014). More recently, striatal patches have been shown to be  
71 necessary for normal habit formation: specific lesions of patch neurons diminish habitual  
72 responding following reward devaluation (Jenrette et al., 2019) or changes in action-outcome  
73 contingencies (Nadel et al., 2020).

74 In the current study, we employed optogenetics in Sepw1-NP67 mice with enriched Cre  
75 recombinase expression in striatal patches (Gerfen et al., 2013) to selectively target patches.  
76 Patches or patch projections were stimulated at reward retrieval during a variable interval schedule  
77 of responding, a task used to induce habitual responding (Gremel and Costa, 2013; Rossi and Yin,  
78 2012). Mice that received stimulation of striatal patches reduced lever pressing and head entry  
79 rates to a greater extent than YFP controls following reward devaluation, implying impaired habit  
80 formation. Following retraining and subsequent reward devaluation, acute stimulation of patches  
81 was sufficient to drive habitual reward seeking behaviors. Contrary to a prior study using non-  
82 selective electrical self-stimulation (White and Hiroi, 1998) we did not find optogenetic  
83 stimulation of patches to be reinforcing in a place preference task, but stimulation of patches did  
84 elevate locomotion in an open field. Finally, to investigate how patch activation modifies circuit  
85 function, we employed fast-scan cyclic voltammetry to measure striatal dopamine levels *in vivo*  
86 and determined that optogenetic activation of patches suppresses dopamine release driven by  
87 electrical stimulation of excitatory inputs. Together, these results suggest striatal patches are a key  
88 site underlying habit formation and that activating patches can drive habitual reward seeking,  
89 potentially by modulating striatal dopamine levels.

90

## 91 **Results**

### 92 **Optogenetic manipulation of striatal patches or projections in variable interval training**

93 To investigate the role of patch neurons in habit formation, we utilized Sepw1-NP67 mice,  
94 which have enriched Cre recombinase expression in striatal patches (Gerfen et al., 2013; Smith et  
95 al., 2016). Crossing these mice with a Cre-dependent GFP reporter line shows enriched GFP+  
96 neurons in  $\mu$ -opiate receptor dense striatal patches (Crittenden and Graybiel, 2011, Figure 1C),  
97 though as previously reported, this line also expressed Cre in “exo-patch” neurons, which display  
98 similar gene expression and physiological profiles to patch neurons (Smith et al., 2016). We  
99 injected Sepw1-NP67 mice with an AAV encoding either Cre-dependent light-gated cation  
100 channel ChR2 or YFP in the dorsal striatum, which resulted in enriched ChR2 expression in striatal  
101 patches (Figure 1D). We then implanted fiber optics targeting cell bodies of striatal patch neurons,  
102 patch terminals in SNc (Evans et al., 2020), or at patch terminals in entopeduncular nucleus  
103 (Stephenson-Jones et al., 2016; Wallace et al., 2017; Figure 1A + B) with the expectation that these  
104 two pathways may differentially modulate habitual responding due to potentially opposing effects  
105 on dopamine neurons. However, no implantation site-dependent differences were observed in  
106 performance during training, habit probes, open field, or place preference tasks ( $p > 0.05$ ),  
107 therefore fiber optic placement groups were collapsed into a general “ChR2” group for comparison  
108

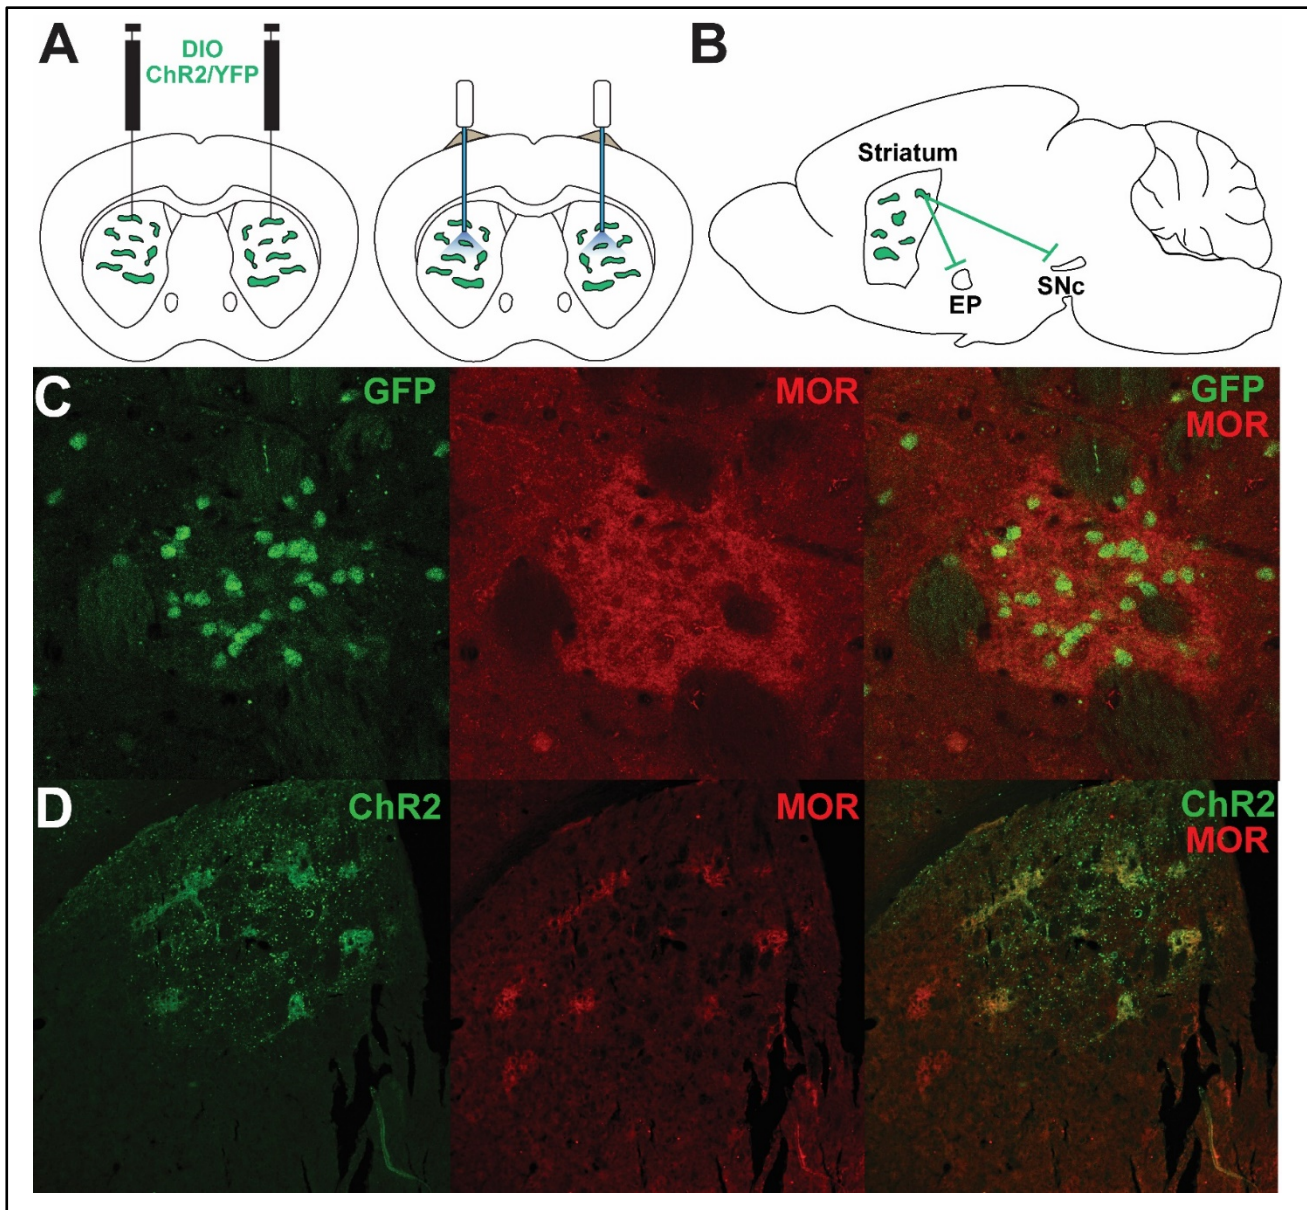

109  
110

111 **Figure 1. Experimental Design and Characterization of Sepw1-Cre Mice.** A. Experimental design. Bilateral AAV  
112 driving expression of channelrhodopsin-2 (ChR2) or YFP was injected into dorsal striatum (left). Fiber optics were  
113 affixed just dorsal to injection site (right). B. Patches in striatum, or patch projections to entopeduncular nucleus (EP)  
114 or substantia nigra pars reticulata were targeted with fiber optic implants. C. Coronal section showing Cre dependent  
115 expression of GFP and  $\mu$ -opioid receptor expression demonstrating enriched Cre expression in a striatal patch. D.  
116 Coronal section showing AAV5-driven expression of ChR2-eYFP overlaid with  $\mu$ -opioid receptor expression.

117

118 with YFP controls (individual group data is shown in supporting figures matching main figure  
119 numbers; Supporting Figures 2-5).

120 Three weeks after surgery, mice were food restricted and trained to depress a lever on a  
121 continuous reinforcement schedule (CRF), a variable interval averaging 30 sec (VI30), then a  
122 variable interval averaging 60 sec (VI60) schedule of reinforcement (see Figure 2A for behavioral  
123 schedule), which induces habitual behavior in mice (Rossi and Yin, 2012). Beginning in VI60,

124 mice received laser stimulation through fiber optics at reward retrieval (first headentry following  
 125 reward delivery; 3 sec, 5 Hz, 5 mW stimulation). Both ChR2 and YFP mice increased press rates  
 126 across CRF and VI training (two-way repeated measures ANOVA, significant effect of time,  $F_{(14, 392)} = 20.04$ ,  $p < 0.0001$ ). However, ChR2-stimulated mice had a tendency to press at a slightly  
 127 higher rate across training (trending effect of group,  $F_{(1, 28)} = 3.841$ ,  $p = 0.060$ ; no significant  
 128 interaction,  $p > 0.05$ ; Figure 2B). This phenomenon was not attributable to differences during VI30  
 130 training ( $t_{28} = 0.7205$ ,  $p = 0.477$ ; Figure 2C), but rather a tendency for ChR2 mice to increase  
 131 pressing following the onset of stimulated trials in VI60 ( $t_{28} = 2.013$ ,  $p = 0.054$ ; Figure 2D). We  
 132 previously found that caspase-driven lesions of striatal patches increased response variability  
 133 across days (Nadel et al., 2020), and similarly, optogenetic activation of patches during VI60  
 134 training had a tendency to reduce press rate consistency as assessed by day-to-day autocorrelation  
 135 (lag 1 day; unpaired t-test,  $t_{28} = 1.691$ ,  $p = 0.102$ ; Figure 2E).  
 136

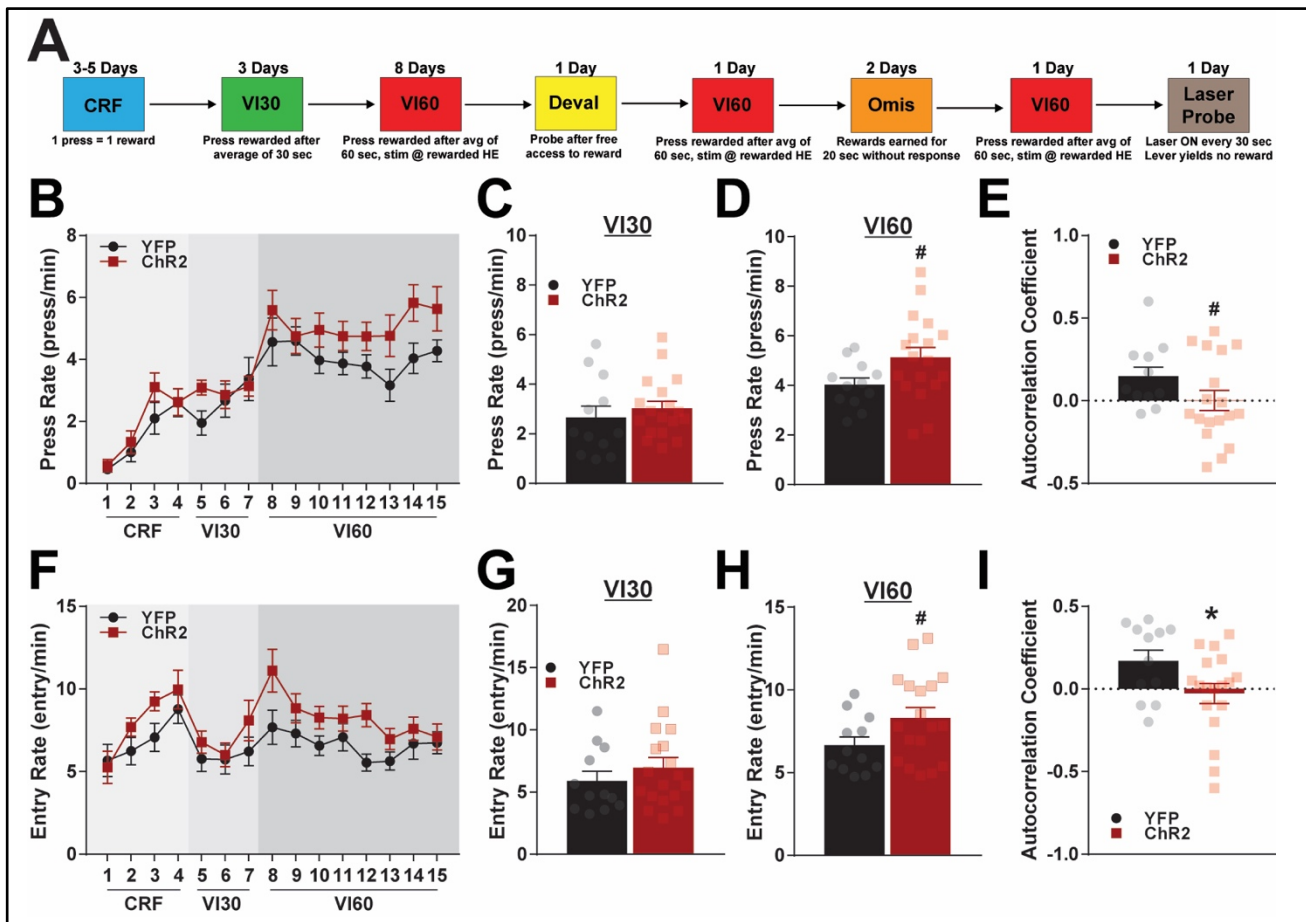

137  
 138  
 139 **Figure 2. Optogenetic patch stimulation during variable interval training.** A. Timeline of behavioral schedule. Mice were trained on a continuous reinforcement schedule (CRF) before beginning variable interval 30 training (VI30). Following this, mice began a variable interval 60 schedule (VI60), and optogenetic stimulation of patches or patch projections occurred during reward retrieval. Mice then experienced reward devaluation before being retrained on VI60. Mice then experienced and two days of omission (Omis). Finally, following retraining on VI60, mice experienced a “Laser Probe” trial. See Methods for details of each behavioral schedule. B. Press rates for ChR2 and

Figure 2 continued on next page

145 YFP control mice across training. C-D. Average response rates across VI30 (C) or VI60 (D). E. Autocorrelation  
146 coefficients for press rates across VI60 training. F. Head entry rates to the food magazine across training for ChR2  
147 and YFP mice. G-H. Average head entry rates across VI30 (G) and VI60 (H). I. Autocorrelation coefficients for entry  
148 rates across VI60 training. \* $P < 0.05$ ; # $P < 0.1$ ; error bars, SEM.

---

149  
150 In addition to lever pressing, head entry to the food magazine has been used to assess  
151 flexibility (DePoy et al., 2016; Morrison et al., 2015; Sieburg et al., 2019). ChR2 mice and YFP  
152 controls both altered their entry rates across training (two-way repeated measures ANOVA,  
153 significant effect of time,  $F_{(14, 392)} = 5.148$ ,  $p < 0.0001$ ), though ChR2 mice tended to have higher  
154 entry rates (trending effect of group,  $F_{(1, 28)} = 3.204$ ,  $p = 0.0843$ ; no significant interaction,  $p >$   
155  $0.05$ ; Figure 2F). This was also not attributable to VI30 ( $t_{28} = 0.8953$ ,  $p = 0.3782$  Figure 2G), but  
156 a trending increase in entry rate was noted during stimulated VI60 trials ( $t_{28} = 1.922$ ,  $p = 0.0649$ ;  
157 Figure 2H). Additionally, activating patches across VI60 training resulted in even clearer  
158 disruption of day-to-day consistency in head entries as assessed by autocorrelation (lag 1 day;  
159 unpaired t-test,  $t_{28} = 2.145$ ,  $p = 0.0407$ ; Figure 2I). Taken together, this data suggests that ChR2  
160 injections do not impair learning in CRF or VI30, but that stimulation of patches slightly  
161 invigorates responding in VI60 when stimulation is paired to rewarded head entries. Further, this  
162 data suggests that modulation of patches impairs day-to-day response consistency.

163

#### 164 **Characterizing patches stimulation during learning in devaluation and omission probes**

165 Habits are operationally defined as behaviors resistant to outcome devaluation. Therefore,  
166 after the completion of eight VI60 training days, mice received free access to sucrose for an hour  
167 before being returned to behavioral chambers for a 5 min devaluation probe trial. Visual  
168 confirmation was made to ensure each mouse drank sucrose during free access, and the weight of  
169 sucrose consumed was not significantly different between implantation sites (Fig, S3A;  $p > 0.05$ )  
170 or between ChR2 and YFP mice (Figure S3B;  $p > 0.05$ ) in a subgroup of mice. During probe trials,  
171 lever presses and head entries were recorded, but no rewards were delivered. ChR2 and YFP mice  
172 did not significantly differ in raw press rate during devaluation (unpaired t-test,  $t_{28} = 1.382$ ,  $p =$   
173  $0.178$ ; Figure 3A). However, due to the increased variability in ChR2 mice and slightly different  
174 press rates between groups, we normalized the devaluation press rate to mean press rates across  
175 VI60 for each mouse. ChR2 mice pressed significantly less in the devaluation probe when  
176 normalized to baseline responding, indicating weaker habit formation (unpaired t-test,  $t_{28} = 2.261$ ,  
177  $p = 0.0317$ ; Figure 3B). Similarly, ChR2 mice entered the reward port less frequently than YFP  
178 controls during devaluation probes, both in raw ( $t_{27} = 3.398$ ,  $p = 0.0021$ ; Figure 3C) and normalized  
179 entry rate ( $t_{27} = 3.845$ ,  $p = 0.0007$ ; Figure 3D).

180 One day after devaluation probes, mice were retrained on a VI60 schedule with optogenetic  
181 stimulation of patches to reinstate robust pressing before beginning two days of omission probes.  
182 In omission, mice were required to abstain from pressing for 20s in order to receive a reward. This  
183 probe has been used as an alternative means to assess habit by measuring flexibility in forming  
184 new action-outcome contingencies (Yin et al., 2005, 2004), and we previously reported that mice  
185 with patch lesions have reduced pressing in omission trials. However, we did not observe any

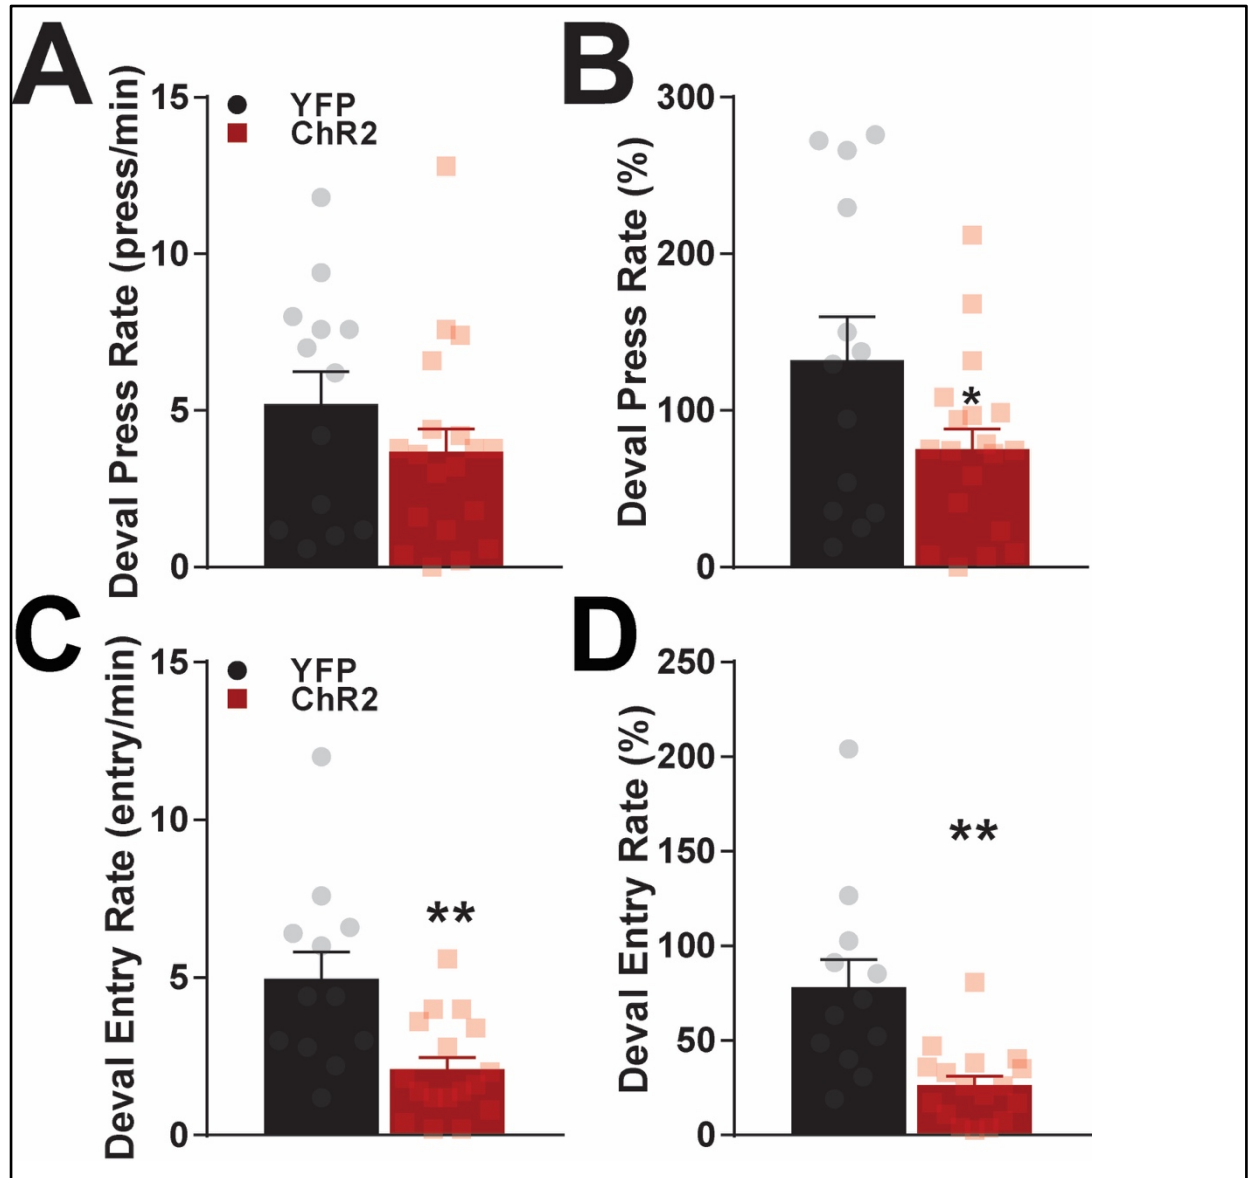

186  
187

188 **Figure 3. Effects of optogenetic patch manipulation in learning following devaluation.** A. Average press rates  
189 during devaluation probe trials (see Methods). B. Average press rates in devaluation probes normalized to baseline  
190 responding during VI60 training. C. Average head entry rates during devaluation probe trials. D. Average head entry  
191 rates in devaluation probes normalized to baseline entry rate during VI60 training. \* $P < 0.05$ ; error bars, SEM.  
192

193 effect of ChR2 stimulation on raw or normalized press or entry rates relative to controls  
194 (Supporting Figure 1A-F, all  $p > 0.05$ ). As expected, YFP mice had a strong correlation between  
195 press rate on day 1 of omission and press rate on the reinstatement day between devaluation and  
196 omission probes (Pearson's correlation,  $R^2 = 0.551$ ,  $p = 0.0057$ ; Supporting Figure 1G). However,  
197 ChR2 mice did not display any correlation between press rates during these days ( $R^2 = 0.0095$ ,  $p$   
198  $= 0.6993$ ; Supporting Figure 1H). This finding could further suggest impaired day-to-day  
199 consistency in responding in patch stimulated mice.  
200

## 201 **Determining acute effects of optogenetic stimulation of patches following devaluation**

202 If patches encode habits, we reasoned that acute optogenetic stimulation of patches may  
203 drive habitual responding even following reward devaluation. Mice therefore underwent another  
204 day of VI60 retraining with optogenetic stimulation to reinstate robust pressing. Following this,  
205 mice began a novel probe trial, which began with one hour of free access to sucrose to devalue  
206 rewards. Mice were then placed in the operant chamber with the lever extended, though no rewards  
207 were delivered. Laser stimulation was delivered on a variable 60 sec interval, which was not  
208 contingent on responding, and trials lasted 30 min (referred to as a “laser probe” trials). Press rates  
209 for YFP and ChR2 are shown relative to laser onset (blue) in Figure 4A. Laser stimulation did not  
210 alter pressing behaviors in YFP mice (paired t-test,  $t_8 = 0.0622$ ,  $p = 0.9519$ ; Figure 4B). To our  
211 surprise, laser stimulation in ChR2 mice was immediately followed by a near-significant decrease  
212 in lever pressing ( $t_{10} = 2.193$ ,  $df = 10$ ,  $p = 0.0531$ ; Figure 4C). To investigate what happens during  
213 this decrease in pressing, we repeated this analysis focusing on head entries before and after  
214 stimulation (Figure 4D). Again, stimulation in YFP controls did not alter entry rate ( $t_8 = 0.4415$ ,  $p$   
215  $= 0.6705$ ), however, ChR2 immediately increased entry rate following stimulation ( $t_{10} = 3.049$ ,  $p$   
216  $= 0.0123$ ). These data suggest that patch stimulation drives habitual reward seeking following  
217 reward devaluation.

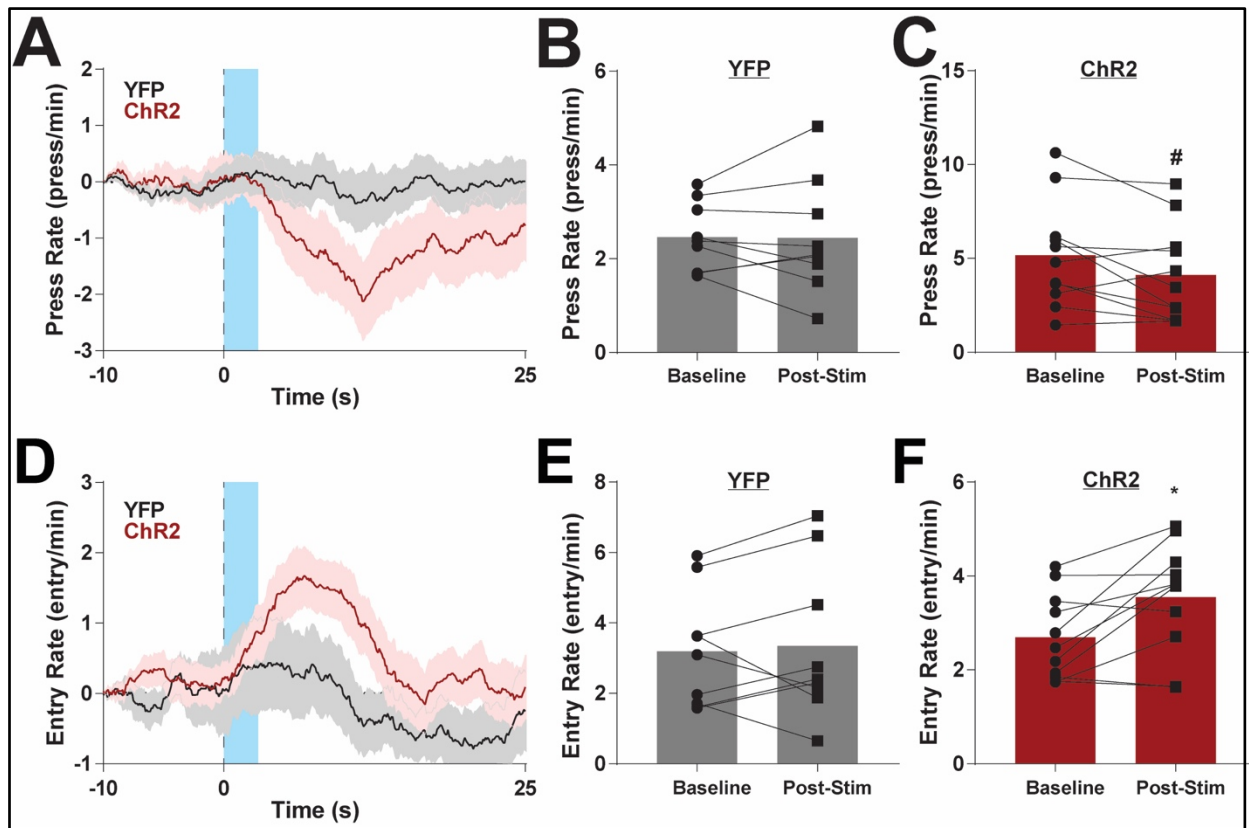

218 **Figure 4. Effects of acute optogenetic patch manipulation in laser probe trials.** A. Average baseline normalized  
219 press rates before and after laser onset. Laser stimulation (5Hz, 3 sec) is indicated by blue. B-C. Press rates before and  
220 after laser onset for YFP (B) or ChR2 (C) mice. D. Average baseline normalized head entry rates before and after laser  
221 stimulation. E-F. Head entry rates before and after laser onset for YFP (E) or ChR2 (F) mice. # indicates a significant  
222 decrease in press rate, \* indicates a significant increase in entry rate.

Figure 4 continued on next page



223 onset. E-F. Head entry rates before and after laser onset for YFP (E) or ChR2 (F) mice. \* $P < 0.05$ ; # $P < 0.1$ ; error  
224 bars, SEM.

225

## 226 Determining patch contributions to locomotion and place preference

227 Patch stimulation could modify responding by being inherently rewarding (White and  
228 Hiroi, 1998). To explore this possibility, we next investigated the effects of patch stimulation on  
229 reinforcement in a place preference task. To test the effects of optogenetic stimulation on  
230 reinforcement, mice began a two-day real-time place preference task in a 2-chamber apparatus.  
231 Entry to a randomly selected side resulted in laser stimulation (5 sec ON and 5 sec OFF, cycled),  
232 which ended upon entrance to the opposite chamber. The stimulation side was counterbalanced  
233 across 2 days and preference was averaged between days (see Methods). Patch activation did not  
234 drive differences in time spent on the stimulation side relative to YFP controls (unpaired t-test,  $t_{27}$   
235 = 1.143,  $p = 0.2631$ ; Figure 5A). These results suggest that optogenetic stimulation of patches is  
236 not inherently reinforcing in this place preference task.

237

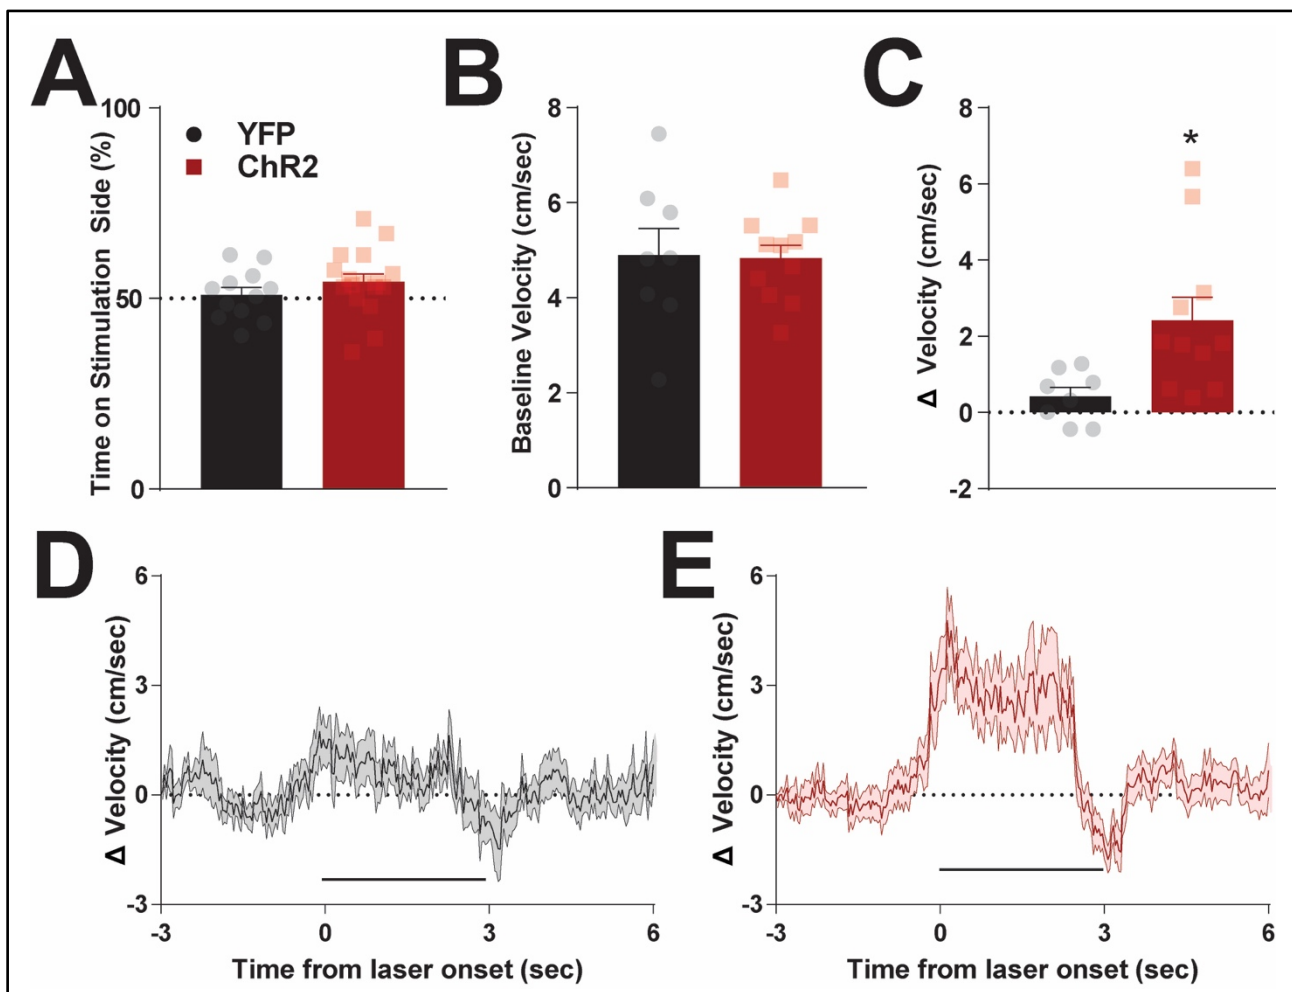

238

239

240 **Figure 5. Effects of optogenetic stimulation of patches on reinforcement and locomotion.** A. Time spent on  
241 stimulated side of a two-chamber place preference apparatus. Time is averaged between two days, and stimulated side

*Figure 5 continued on next page*

242 was counter balanced between days (see Methods). B. Average velocity in the open field for YFP and ChR2 mice. C.  
243 Change in velocity following laser onset in open field. D-E. Average baseline normalized velocity before and after  
244 laser onset (5 Hz, 3 sec; denoted by thick black line) for YFP (D) and ChR2 (E) mice. \* $P < 0.05$ ; error bars, SEM.

245  
246 Due to a predominant D1 dopamine receptor makeup (Smith et al., 2016), patch stimulation  
247 may alter behavior by invigorating movement (Kravitz et al., 2010). To explore this possibility,  
248 mice were placed in a custom open field chamber to assess the effects of patch stimulation on  
249 locomotion, and laser stimulation occurred every 60 sec while the location of the mouse was  
250 tracked (see Methods). We first assessed if intermittent patch stimulation elevated average  
251 locomotion throughout the task, and found no difference in movement speed between ChR2 and  
252 YFP mice (unpaired t-test,  $t_{17} = 0.1127$ ,  $p = 0.9116$ ; Figure 5B). However, onset of laser  
253 stimulation significantly increased locomotion in ChR2 mice relative to controls (unpaired t-test,  
254  $t_{17} = 2.708$ ,  $p = 0.0149$ ; Figure 5C). On a finer timescale, YFP controls showed modest responses  
255 to laser stimulation (Figure 5D). On the other hand, ChR2 mice demonstrated robust initial  
256 increases following laser onset, which plateaued until cessation of stimulation, followed by a short  
257 reduction in movement (Figure 5E). Together, these results show that patch activation can acutely  
258 drive locomotion without being intrinsically reinforcing.

### 259 260 **Characterization of patch and dopamine interactions *in vivo***

261 As striatal patches are a unique striatal output population projecting to SNc (Crittenden et  
262 al., 2016; Davis et al., 2018; Evans et al., 2020), optogenetic stimulation of patches may alter  
263 responding by modulating dopamine release. We aimed to investigate this possibility by eliciting  
264 phasic increases in striatal dopamine with electrical stimulation of the pedunculopontine tegmental  
265 nucleus (PPTg; Forster and Blaha, 2003; Zweifel et al., 2009) with and without simultaneous  
266 optogenetic activation of patch projections. We first injected a group of Sepw1-NP67 mice with  
267 AAV encoding Cre-dependent ChR2. Three weeks later, mice were anesthetized and a glass-sealed  
268 carbon-fiber microelectrode capable of detecting real-time changes in dopamine with fast-scan  
269 cyclic voltammetry was lowered into the dorsal striatum. Following this, a bipolar stimulating  
270 electrode was placed in the PPTg. Once robust dopamine was detected, a fiber optic was lowered  
271 into the SNc targeting patch terminals (see Figure 6A for experimental design).

272 Stimulation of PPTg resulted in increases in striatal dopamine that mimicked naturally  
273 occurring phasic increases in dopamine (Howard et al., 2013; Robinson et al., 2002; Figure 6B,  
274 left). When PPTg stimulation occurred simultaneously with optogenetic patch activation, phasic  
275 dopamine responses were present, but reduced in amplitude (Figure 6B, right). On average, PPTg  
276 stimulation alone resulted in larger responses relative to simultaneous electrical and optogenetic  
277 stimulation. On the other hand, optogenetic patch activation alone caused a small decrease in  
278 detected current (Figure 6C; Supporting Figure 6A). When recordings were normalized to average  
279 PPTg stimulation recording amplitude to account for baseline differences in release between  
280 subjects, PPTg stimulation drove a larger dopamine response than simultaneous PPTg and patch  
281 activation, which was significantly higher than optogenetic activation alone (One-way ANOVA,  
282  $F_{(2,6)} = 53.97$ ,  $p < 0.0001$ ; *post hoc* Tukey multiple comparison test all  $p < 0.01$ ; Figure 6D).

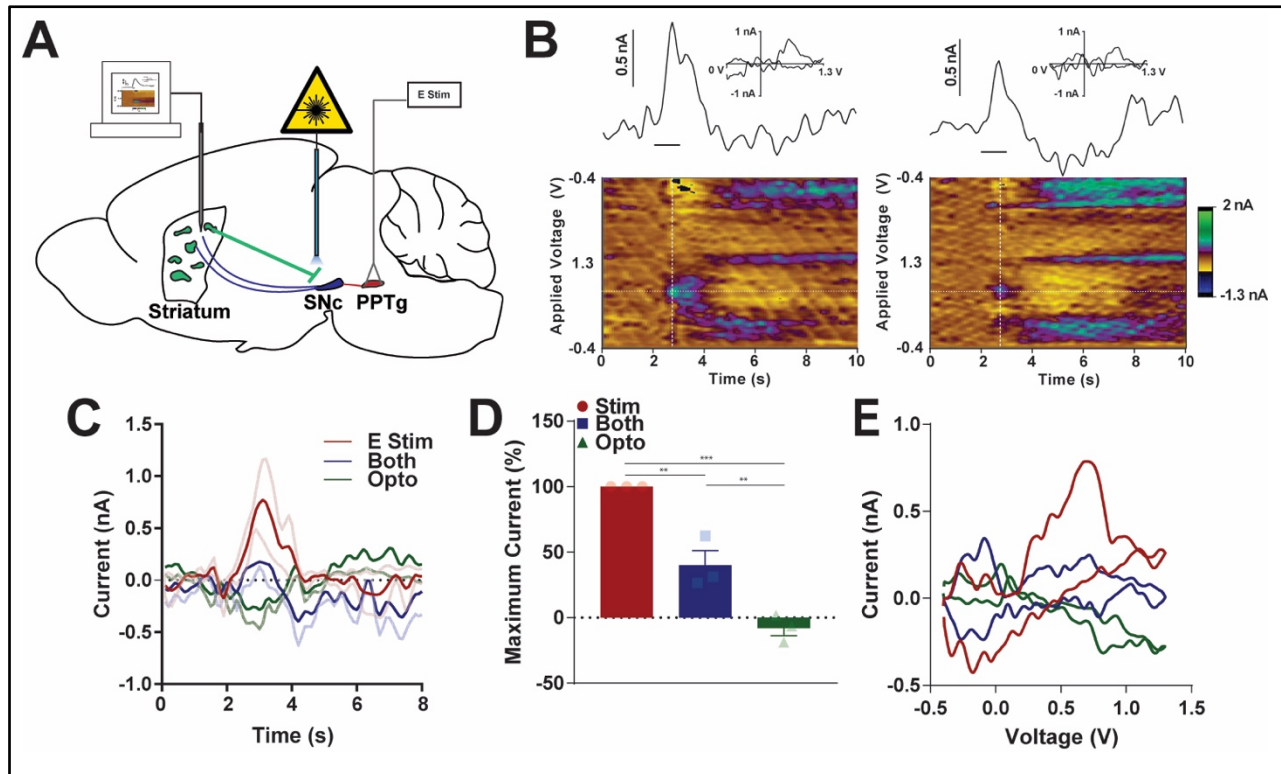

283  
284

285 **Figure 6. Characterizing optogenetic patch stimulation on striatal dopamine release.** A. Experimental design.  
286 Sepw1 NP67 mice were injected with AAV5 driving Cre-dependent expression of ChR2-eYFP. Fast-scan cyclic  
287 voltammetry was used to monitor real-time changes in dopamine levels in striatum. An electrical stimulating  
288 electrode was placed in pedunculopontine nucleus (PPTg) to drive increases in dopamine in dorsal striatum. A fiber  
289 optic was placed above patch terminals in substantia nigra pars compacta (SNc). Electrical or optogenetic or both  
290 stimulation types were randomly selected and delivered a minimum of three times each (see Methods). B. (left)  
291 Representative recording of electrical stimulation of PPTg. Here, a line shows recorded current relative to  
292 stimulation delivery (straight line below current trace) above a pseudo-color plot. The color plot shows current  
293 collected (in color) at each waveform scan (y-axis) and across time (x-axis). INSET: a “cyclic voltammogram”  
294 collected at the vertical white dotted line on the pseudo-color plot suggesting that dopamine is the predominate  
295 analyte being monitored. (right) Same as left, but optogenetic stimulation of patch terminals occurs simultaneously  
296 with PPTg electrical stimulation. C. Average responses across replicates for each of the three stimulation types.  
297 PPTg stimulation only denoted as E Stim, optogenetic stimulation of patch terminals as Opto. D. Maximum  
298 recorded current during stimulation normalized to electrical PPTg stimulation. E. Average cyclic voltammogram  
299 across replicates for each stimulation type. \* $P < 0.05$ ; \*\* $P < 0.01$ ; \*\*\* $P < 0.001$ ; error bars, SEM.

300

301 Inspection of average cyclic voltammograms further suggests the analyte detected following PPTg  
302 stimulation is dopamine, and the peak oxidation is reduced following simultaneous optogenetic  
303 and electrical stimulation (Figure 6E; average current and cyclic voltammograms for each  
304 experimental replicate shown in Supporting Figure 6B). These results suggest that patch  
305 projections to dopamine neurons are capable of suppressing dopamine release in the dorsal  
306 striatum, which may contribute to the effects noted in the behavioral tasks.

307

308

## 309 **Discussion**

310 The striatum is a key locus in the transition from flexible to habitual strategies, but less is known  
311 about how particular striatal subcircuits contribute to this phenomenon. Previous studies have  
312 implicated striatal patches, or striosomes, in this process (Canales and Graybiel, 2000; Murray et  
313 al., 2015, 2014), and more recent work has demonstrated that intact patches are necessary for  
314 normal habit formation (Jenrette et al., 2019; Nadel et al., 2020). The current work further  
315 addresses the role of patches in habit through use of optogenetics to modulate patch neuron activity  
316 in a temporally-precise manner during habit formation. Patch stimulation enhanced behavioral  
317 variability and invigorated responding across training. Additionally, optogenetic stimulation of  
318 patch activity during learning suppressed the rate of lever pressing and head entry to the reward  
319 port following reward devaluation, suggesting impaired habit formation. Next, we developed a  
320 novel probe trial aimed at determining how mice respond following stimulation of patches  
321 following reward devaluation. In these so-called ‘laser probe’ trials, stimulation of patches acutely  
322 suppressed lever pressing and augmented head entry to the food port, suggesting acute patch  
323 activation can drive habitual reward seeking. These effects were likely not attributable to directly  
324 reinforcing effects of patch stimulation as assessed in a place preference task, though stimulation  
325 of patches was sufficient to augment locomotion in an open field. Finally, we demonstrated that  
326 optogenetic stimulation of patch terminals is sufficient to suppress dopamine release driven by  
327 electrical stimulation of excitatory inputs to dopamine neurons. Together, these results suggest that  
328 patches are a key site of habit formation and that patch activation can modify habitual responding,  
329 potentially through regulation of striatal dopamine levels.

330

### 331 **Patches as a locus of habitual behavior**

332 The finding that patch manipulation impairs habitual responding is supported by previous studies  
333 using Cre-dependent caspase lesions (Nadel et al., 2020) or a conjugated cytotoxin that selectively  
334 ablates  $\mu$ -opioid receptor expressing neurons (Jenrette et al., 2019), both finding impairments in  
335 habitual responding. These patch manipulations, and the optogenetic approach utilized here, target  
336 the central striatum, likely affecting patches in both medial and lateral striatum. A now well-  
337 supported model proposes that the medial striatum encodes goal-oriented behavior, while the  
338 lateral striatum encodes habitual responding (Yin and Knowlton, 2006), a distinction which may  
339 also apply to dopamine neurons (Faure et al., 2005; Lerner et al., 2015). Patches span the  
340 medial/lateral spectrum of the striatum, and studies manipulating patches specifically within  
341 medial or lateral striatum should be pursued to determine if there is a functional divide within  
342 medial and lateral patches.

343 One puzzling aspect of the current work is how activation of patches through the use of  
344 optogenetics could impair habit formation, when lesioning patches has a similar effect (Jenrette et  
345 al., 2019; Nadel et al., 2020). We propose two ideas to explain this paradoxical finding. First,  
346 optogenetic stimulation may enhance ongoing patch activity, but could impair the timing of  
347 spiking relative to afferent activation during learning, thus disrupting plasticity during the  
348 transition to habitual responding. Striatal neurons have been shown to be highly sensitive to spike-

349 timing of corticostriatal inputs, and modifying afferent and spiny projection neuron spike timing  
350 by milliseconds can reverse the valence of plasticity in these cells (Fino and Venance, 2010). We  
351 chose to deliver optogenetic stimulation during reward retrieval based on previous studies showing  
352 activity increases in patches to rewards or cues predicting rewards (Bloem et al., 2017; Yoshizawa  
353 et al., 2018). However, direct electrophysiological or optical recordings of patches would be  
354 required to determine patch activity in this variable interval schedule. Alternatively, optogenetic  
355 activation of patches may drive rebound inhibition, which may lead to impairments in habit  
356 formation by suppressing patch activity following cessation of laser firing. Rebound excitation and  
357 inhibition have been well characterized during inhibition or excitation of neuronal circuits with  
358 optogenetics (Häusser, 2014). Indeed, we note potential behavioral evidence of this phenomenon  
359 in the current work: patch activation in open field drives robust increase in locomotion, followed  
360 by a brief inhibition of movement where locomotor behaviors fall below baseline (Figure 5E).  
361 Future physiological studies of patch function should explore how patch activity is modified during  
362 habit learning.

363

### 364 **Patch manipulation decreases responding in devaluation probe trials**

365 Reduced responding during devaluation probes could be partially explained by an elevated  
366 response rate during stimulated VI60 trials. That is, if laser stimulation invigorates responding,  
367 normalizing responding to an elevated baseline may drive this effect. While this possibility cannot  
368 be completely resolved, a lower number of total head entries, which are not normalized to baseline  
369 (Figure 3C), argues against this being the only factor contributing to reduced responding following  
370 devaluation. An additional limitation of the current study is the lack of a matrix specific  
371 manipulation to determine specificity of this effect is to patches. Indeed, matrix lesions have been  
372 shown to impair fine motor coordination (Lopez-Huerta et al., 2016), but the role of the matrix has  
373 not been investigated in habit formation. However, this work suggests that specific manipulation  
374 of patch neurons is sufficient to alter habit formation, adding to a growing body of literature  
375 indicating patches are a key site in the transition to habitual responding (Canales and Graybiel,  
376 2000; Jenrette et al., 2019; Murray et al., 2015, 2014; Nadel et al., 2020).

377 Importantly, the current work lacks a “non-devalued”, or “valuation” probe trial, which  
378 controls for general satiety following free access to rewards (Balleine and Dickinson, 1998;  
379 Colwill and Rescorla, 1985). Valuation probes often utilize free access to a reward that is different  
380 from rewards earned during in training (eg. maltodextrin solution, homecage chow; Nelson and  
381 Killcross, 2006; Shillinglaw et al., 2014; Yu et al., 2009) and several studies have described the  
382 degree of habit as a ratio of responding in devaluation vs. valuation probe trials (Gremel and Costa,  
383 2013; O’Hare et al., 2017, 2016). Valuation probes were omitted in the current study due to our  
384 previous finding that Sepw1-NP67 mice rapidly suppress responding across two days of probe  
385 trials regardless of reward type, which obscured results of devaluation (Nadel et al., 2020). When  
386 sucrose was weighed before and after free access in a subgroup of mice, we found no difference  
387 in the weight of sucrose consumed (Figure S3A+B) suggesting similar satiety across animals.

388 Nevertheless, lack of a control to ensure reward-specific devaluation is a potential confound of the  
389 current study.

390 Stimulation of patches across training reduced head entry to the food magazine in  
391 devaluation trials. On the other hand, acute activation of patches following reward devaluation was  
392 sufficient to drive head entry to the food magazine. This unexpected finding could suggest that  
393 patch activation directly drives habitual reward seeking. Previous studies have utilized head entry  
394 as a metric for habitual responding and reward devaluation has been shown to reduce head entry  
395 in goal-directed animals (DePoy et al., 2016; Morrison et al., 2015; Rode et al., 2020). Discrete  
396 head entry and lever pressing events could be ‘chunked’ into larger learned action sequences that  
397 are reinforced across habit formation (Dezfouli and Balleine, 2013). Striatal patches may serve as  
398 a neural substrate of this hierarchical reinforcement, as both press and entry rate are reduced in  
399 devaluation probes following patch manipulation. Because striatum is necessary for expression of  
400 learned action sequences (Berridge and Whishaw, 1992; Yin, 2010), and as striatal activity  
401 encodes action chunking (Jin et al., 2014; Jin and Costa, 2010) with differential contribution of  
402 direct and indirect pathways (Geddes et al., 2018), future studies should explore the contribution  
403 of patch/matrix subcircuits on sequence learning.

404

#### 405 **Patches and behavioral variability**

406 During training, optogenetic stimulation of patches resulted in lower autocorrelation  
407 coefficients (Figure 2E+I), suggesting impaired day-to-day consistency in responding. Further,  
408 correlation of responding during retraining and omission probes were disrupted in ChR2 mice  
409 (Supporting Figure 1G-H) which may reflect enhanced behavioral variability across days. These  
410 findings are supported by our previous study, which found that Cre-dependent lesions in Sepw1-  
411 NP67 mice similarly disrupted autocorrelations and increased behavioral variability (Nadel et al.,  
412 2020). These studies together suggest that patches may support habit formation by facilitating  
413 crystallization of action patterns. Indeed, generalized lesions of the dorsal striatum tend to increase  
414 behavioral variability in foraging tasks (Charnov, 1976; Compton, 2004). In support of this notion,  
415 mice in “laser probe” trials show a correlation between response rates in retraining and following  
416 devaluation (Supporting Figure 4 K-L). It is possible that patch neurons may play a general role in  
417 reducing behavioral variability across learning, though more studies are required to directly test  
418 this idea.

419

#### 420 **Patches and behavioral invigoration**

421 Additionally, in training, we found that optogenetic stimulation of patches tended to  
422 enhance ongoing behaviors. ChR2 mice showed slightly increased press and entry rates during  
423 VI60 (Figure 2D+H), increased locomotion in open field (Figure 5C-E), and drove increased entry  
424 into the food port during laser probes (Figure 4D+F). This may be due to an enriched population  
425 of direct-pathway, D1 dopamine receptor-expressing neurons in patches (Miyamoto et al., 2018;  
426 Smith et al., 2016). Indeed, optogenetic stimulation of D1 populations enhances movement  
427 (Kravitz et al., 2010) through inhibition of basal ganglia output nuclei (Freeze et al., 2013).

428 However, a recent study suggests that striosomes can be further subdivided into functionally  
429 distinct populations, both of which predominantly express D1 receptors. Contrary to the current  
430 work, optogenetic stimulation of Teashirt family zinc finger 1 (Tshz1) expressing neurons in  
431 striosomes drives aversion and suppression of movement. On the other hand, optogenetic  
432 activation of prodynorphin expressing neurons, which are also enriched in patches drives  
433 reinforcement and activation of movement (Xiao et al., 2020). Based on this, it is possible that our  
434 Sepw1 NP67 line overlaps more closely with prodynorphin-Cre mice, which is supported by  
435 previous work (Smith et al., 2016). Future studies will undoubtedly move toward further  
436 subdividing diverse neuron populations in patches and matrix to determine their role in behavioral  
437 regulation.

438

### 439 **Patch-dopamine interactions**

440 This work provides new insight into the relationship between striatal patches and dopamine  
441 release, demonstrating that optogenetic stimulation of patch projections suppresses dopamine  
442 release in the dorsal striatum (Figure 6). Previous studies have supported this notion demonstrating  
443 anatomical (Crittenden et al., 2016; Fujiyama et al., 2011; Gerfen, 1985; Watabe-Uchida et al.,  
444 2012) and functional connectivity (Evans et al., 2020; McGregor et al., 2019). Patches could  
445 therefore regulate habitual behavior by sculpting dopamine release across learning. Indeed,  
446 dopamine responses transition from ventromedial to dorsolateral striatum as behaviors become  
447 well learned (Willuhn et al., 2012), and patches could be involved in gating of dopamine release  
448 early in learning. Moreover, patches could provide feed-forward inhibition to dopamine neurons,  
449 which may facilitate the activity shift from reward to cue during Pavlovian conditioning (Schultz,  
450 1998), and which could drive negative dopamine responses during reward omission (Watabe-  
451 Uchida et al., 2017). Very recent work suggests that patch-dopamine interactions are also  
452 reciprocal, as dopamine differentially modulates patch neuron activity relative to matrix neurons  
453 (Prager and Plotkin, 2018). Based on this proposed role of patches regulating dopamine release  
454 and habitual behaviors, it will be of great interest to explore how patches contribute to pathological  
455 compulsive states including drug addiction and Obsessive Compulsive Disorder.

456

457

458

459

460

461

462

463

464

465

466

467

## 468 **Materials and methods**

### 469 **Key Resources Table**

|                                                             |                                        |                                                                                                                          |                 |                                       |
|-------------------------------------------------------------|----------------------------------------|--------------------------------------------------------------------------------------------------------------------------|-----------------|---------------------------------------|
| strain, strain background ( <i>Mus musculus</i> )           | Sepw1-NP7-Cre                          | Charles Gerfen (National Institutes of Health) and Nathaniel Heintz (Rockefeller University) (Gerfen <i>et al.</i> 2013) | RRID:SCR_011431 |                                       |
| strain, strain background ( <i>Adeno-associated virus</i> ) | AAV-EF1a-DIO-hChR2(H134R)-EYFP-WPRE-pA | UNC Viral Vector Core                                                                                                    | RRID:SCR_002448 | 4x10 <sup>12</sup> particles per ml   |
| strain, strain background ( <i>Adeno-associated virus</i> ) | AAV-EF1a-DIO-EYFP                      | UNC Viral Vector Core                                                                                                    | RRID:SCR_002448 | 3.5x10 <sup>12</sup> particles per ml |
| antibody                                                    | anti-MOR antibody                      | Immunostar (24216)                                                                                                       | RRID:AB_572251  | 1::1000                               |
| antibody                                                    | 2° antibody                            | Jackson Laboratory (711-165-152)                                                                                         | RRID:AB_2307443 | 1::250                                |

470

### 471 **Animals**

472 All experiments were in accordance with protocols approved by the Oberlin College Institutional  
473 Animal Care and Use Committee. Mice were maintained on a 12 hr/12 hr light/dark cycle and  
474 unless otherwise noted, were provided *ad libitum* access to water and food. Experiments were  
475 carried out during the light cycle using 41 heterozygous Sepw1-Cre<sup>+/-</sup> mice ranging from 2 to 6  
476 months of age, which were generously provided by Charles Gerfen (National Institutes of Health)  
477 and Nathaniel Heintz (Rockefeller University). These mice preferentially express Cre-  
478 recombinase in striatal patches (Gerfen *et al.*, 2013; Smith *et al.*, 2016, Figure 1C+D).

479

### 480 **Reagents**

481 Isoflurane anesthesia was obtained from Patterson Veterinary (Greeley, CO, USA). Sterile and  
482 filtered phosphate buffered saline (PBS, 1X) was obtained from GE Life Sciences (Pittsburgh, PA,  
483 USA). Unless otherwise noted, all other reagents were obtained through VWR (Radnor, PA, USA).

484

### 485 **Stereotaxic Surgery and Viral Injections**

486 Sepw1-NP67 mice were anaesthetized with isoflurane (4% at 2 L/sec O<sub>2</sub> for induction, 0.5-1.5%  
487 at 0.5 L/sec O<sub>2</sub> afterward) and then placed in a stereotaxic frame (David Kopf Instruments,  
488 Tajunga, CA, USA). The scalp was sterilized with povidone iodine and an incision was made in  
489 the scalp. For optogenetic experiments, the skull was scored with Optibond (Patterson Dental).  
490 Holes were then drilled bilaterally above the dorsal striatum (+0.9 AP, 1.8 ML, -2.5 DV) and 500  
491 nL of an AAV encoding channelrhodopsin (ChR2) (AAV-EF1-DIO-hChR2(H134R)-EYFP-



492 WPRE-pA, UNC Viral Vector Core) was injected. Control mice were injected with an AAV  
493 encoding YFP (AAV-EF1a-DIO-EYFP, UNC Viral Vector Core). For all injections, a 5  $\mu$ L  
494 syringe needle (Hamilton) was lowered to the DV coordinate over 2 minutes and held in place for  
495 1 min before the start of injection. The injection speed was 100 nL/min, and the needle was left  
496 undisturbed in the brain for 5 minutes after the completion of virus delivery, after which the needle  
497 was removed over the course of 5 minutes. Fiber optics were then inserted bilaterally targeting one  
498 of three sites: cell bodies of patch neurons in the striatum (+0.9 AP, 1.8 ML, -2.3 DV), patch  
499 terminals at dopamine neurons of the substantia nigra pars compacta (-3.2 AP, 1.5 ML, -3.6 DV),  
500 or over patch terminals in the entopeduncular nucleus EP (-1.1 AP, 2.1 ML, -4.0 DV; Figure  
501 1C+D), and secured to the skull with dental cement (Patterson Dental). Control mice expressing  
502 YFP had fiber optics implanted targeting one of these three sites selected randomly. Carprofen (5  
503 mg/kg, subcutaneous) was used for postoperative analgesia. A subset of mice were injected with  
504 AAV encoding ChR2 but did not receive fiber optic implants. These mice instead received sterile  
505 sutures to close the incision site (see Fast-Scan Cyclic Voltammetry below). All mice were given  
506 3-4 weeks to allow for viral expression and to recover before behavioral training started.

507

### 508 **Variable Interval Training**

509 Mice were trained on a variable interval schedule to induce habitual responding (Rossi and Yin,  
510 2012, see Figure 2A for schematic of entire behavioral training protocol). Throughout training,  
511 mice were food deprived and kept at ~85% initial weight by daily feeding of 1.5-2.5g of homecage  
512 chow daily after training. All instrumental learning experiments were performed in standard  
513 operant chambers (Med Associates). Each chamber had a retractable lever on either side of a  
514 reward bowl, which was linked to a sucrose-filled syringe that delivered liquid reward (10%  
515 sucrose solution, 20  $\mu$ l) and a house light on the opposite side of the chamber. Briefly, mice first  
516 underwent four days of continuous reinforcement (CRF, one lever press yields one reward) to  
517 establish the association between lever press and reward. At the start of the session, the house light  
518 was illuminated, and one lever was inserted into the chamber. After 60 min or 50 rewards, the light  
519 was shut off, the lever was retracted, and the session ended. On the final day of CRF training, mice  
520 were briefly anesthetized with isoflourane (4%, 2 l/min O<sub>2</sub>) and were connected to fiber optic  
521 leads to habituate mice to the optogenetic apparatus. Mice that failed to reach criteria within four  
522 days were given an additional 1-2 days of CRF training. Subsequent behavioral trials began with  
523 acute anesthetization with isoflourane and connection to fiber optic leads prior to training.  
524 Following CRF training, mice experienced three days of a variable-interval (VI) 30 task, in which  
525 they were rewarded on average 30 seconds (15-45 second range) contingent on lever pressing,  
526 followed by 8 days of VI60 training (rewarded every 60 seconds on average, ranging from 30 to  
527 90 seconds, with each possible interval separated by 6 sec) (Nadel et al., 2020). VI sessions ended  
528 after 60 min or when 50 rewards had been earned. To assess the contribution of patches to habit  
529 formation, mice received optogenetic stimulation (5 mW, 5 Hz, 190 ms pulse width, 3 sec duration,  
530 see below) of patch neurons or terminals during the first headentry following each reward delivery  
531 in all VI60 trials. Patch activity is linked to reward-predicting cues or during reward consumption

532 (Bloem et al., 2017; Yoshizawa et al., 2018), thus this stimulation timing was selected to modulate  
533 ongoing activity in patch neurons.

534

### 535 **Fiber Optic Implants**

536 Fiber optic implants were custom fabricated and were comprised of 0.39 NA, 200  $\mu$ m core  
537 Multimode Optical Fiber (ThorLabs) inserted into a multimode ceramic zirconia ferrules (1.25mm  
538 OD, 230um ID; SENKO). The fiber optic was affixed in the ferrule with two-part epoxy (353ND;  
539 Precision Fiber Products). Each end of the fiber optic was polished using fiber optic sandpaper  
540 (ThorLabs) and functionality was tested ensuring minimal loss of light power and even output  
541 prior to implantation.

542

### 543 **Laser Stimulation**

544 Mice received blue laser stimulation (473 nm, 5 mW, 5 Hz, 190 ms pulse width, 3 sec duration)  
545 from a diode-pumped single-state laser (Laserglow) which was connected via fiber optic (Doric  
546 Lenses) to a commutator (1x2 Fiber-optic Rotary Joint) allowing for free rotation and splitting of  
547 the beam (Doric Lenses). The commutator was connected to two fiber optic leads, which were  
548 attached bilaterally to ferrules on fiber optic implants with a ceramic sleeve (Precision Fiber  
549 Products). Laser output was calibrated to 5 mW from the end of fiber optic leads before training  
550 each day using an optical power meter (ThorLabs). Laser parameters were the same for all  
551 behavioral tasks (VI60, Laser Probes, Open Field) with the exception of Real-Time Place  
552 Preference, where laser stimulation duration was cycled 5 sec ON, then 5 sec OFF (see below).

553

### 554 **Probe Tests**

555 Following 8 days of VI60 training, a reward devaluation test was conducted. Here, mice were  
556 given free access to sucrose for one hour prior to testing. Mice were individually caged during this  
557 access and all mice were observed to ensure they consumed sucrose. To quantify sucrose  
558 consumption, a subgroup of mice had sucrose bottles weighed before and after free access. After  
559 the pre-feeding session, mice were given a 5-min probe test in which the lever was extended and  
560 presses were recorded, but no rewards were delivered. Reward devaluation is commonly used to  
561 probe habitual responding, and mice that persist in lever pressing during devaluation probes are  
562 considered more habitual (Adams and Dickinson, 1981; Gremel and Costa, 2013; O'Hare et al.,  
563 2016). Following devaluation probes, mice experienced one day of VI60 training to reinstate  
564 habitual responding. The following two days, mice were also tested on a 60 minute omission probe  
565 test in which the action-outcome contingency was reversed. Here, mice had to refrain from  
566 pressing the lever for 20 seconds to obtain a reward, and pressing the lever reset the timer (Nadel  
567 et al., 2020). This probe was employed as a second metric of habitual responding, as habitually  
568 responding mice are slower to reverse learned action-outcome contingencies (Yu et al., 2009).  
569 Following two days of omission trials, mice were again retrained on a VI60 schedule to reinstate  
570 lever pressing. The following day, mice underwent a "laser probe" trial. Here, mice again  
571 underwent reward devaluation by gaining free access to sucrose for one hour (as described above).

572 Mice were then returned to operant chambers and the lever was extended and presses were  
573 recorded, but no rewards were delivered. At variable intervals between 30-90 sec (6 sec between  
574 each possible interval) laser stimulation was delivered to fiber optic implants (5 mW, 5 Hz, 190  
575 ms pulse width, 3 sec duration), and laser probe trials lasted a total of 30 min. This probe was  
576 conducted to determine the acute effects of patch stimulation on responding following reward  
577 devaluation.

578

### 579 **Real-Time Place Preference**

580 Following operant conditioning tasks, mice were returned to *ad libitum* access to homecage chow.  
581 At least 3 days later, fiber optic implants were again connected to fiber optic leads and mice were  
582 placed in a 2-chamber place preference apparatus (Med Associates). Each chamber was 16.8 cm  
583 L x 12.7 cm W x 12.7 H with opaque walls. Chambers were distinguishable based on different  
584 flooring (grid vs bars) and different wall coloring (white vs black), and the orientation of the  
585 chamber did not change across place preference trials. To allow fiber optic movement and prevent  
586 mice from exiting the chamber, a custom, clear plexiglass wall extension (45.7 cm tall, 58.4 cm  
587 total height) was placed on the walls above the behavioral apparatus and no lid was utilized. Mice  
588 underwent two days of real-time place preference trials. Here, one chamber was randomly selected  
589 to trigger laser stimulation when mice entered or remained in the ‘active’ chamber, and the active  
590 chamber was counterbalanced across days. Location in the chambers was monitored by 12 evenly-  
591 spaced infrared beam breaks located near the floor of the apparatus. At the first occurrence of a  
592 beam break on the active side, laser stimulation was delivered to the fiber optic implants (5 mW,  
593 5 Hz, 190 ms pulse width). As striatal stimulation can result in freezing depending on the neuronal  
594 population activated (Kravitz et al., 2010), laser stimulation was cycled ON for 5 sec and OFF for  
595 5 sec. This pattern of stimulation occurred until a beam break occurred in the inactive chamber,  
596 when stimulation was halted until the next beam break in the active chamber. Time spent on either  
597 side was compared and averaged across each day to account for inherent preferences for either  
598 side. This task was performed to determine if optogenetic patch stimulation was inherently  
599 reinforcing, as suggested by a previous electrical self-stimulation experiment (White and Hiroi,  
600 1998).

601

### 602 **Open Field**

603 At least one day following RTCPP trials, fiber optic implants were again connected to fiber optic  
604 leads and mice were placed in an open field apparatus (42 cm wide x 42 cm long x 30 cm tall) to  
605 determine the effects of acute patch stimulation on locomotor activity. Every 60 sec laser  
606 stimulation (5 mW, 5 Hz, 190 ms pulse width, 3 sec duration) was delivered to implants. Mouse  
607 locomotion was monitored by a camera and analyzed online using Bonsai software (Open-Ephys).  
608 Movement was detected using a contrast-based binary region analysis and extraction of location  
609 in the video frame (Lopes 2015 Frontiers in Bioinformatics).

610

### 611 **Fast-Scan Cyclic Voltammetry**

612 To determine the impact of patch activation on striatal dopamine release, we utilized fast-scan  
613 cyclic voltammetry (FSCV) to monitor real-time changes in striatal dopamine levels while  
614 simultaneously activating patch terminals with optogenetics *in vivo*. Fast-scan cyclic voltammetry  
615 was performed using custom glass-sealed, carbon-fiber microelectrodes (Cahill et al., 1996;  
616 Howard et al., 2011). Recordings were made by applying a triangular waveform (0.4 to 1.3 V and  
617 back, 400 V/s) every 100ms to the exposed tips of carbon-fiber microelectrodes. Voltammetry and  
618 stimulus control was performed by a WaveNeuro potentiostat (Pine Research) and was computer-  
619 controlled using HDCV software, which was generously provided by the Chemistry Department  
620 at UNC (Bucher et al., 2013). A subset of Sepw1-NP67 mice were injected with AAV driving Cre-  
621 dependent expression of Chr2 as described above. At least 3 weeks later, these mice were  
622 anesthetized using urethane (1 g/kg i.p. delivered in 2 injections separated by ~20 min) and placed  
623 in a stereotaxic apparatus. An incision was made in the scalp and holes were drilled above the  
624 dorsal striatum (+0.8 AP, ±1.5 ML), SNc (-3.2 AP, ±1.5 ML), and pedunculopontine tegmental  
625 nucleus (PPTg, -0.68 AP from lambda, ±0.7 ML). The PPTg sends excitatory projections to  
626 dopamine neurons and was targeted with electrical stimulation to elicit dopamine release in the  
627 striatum (Forster and Blaha, 2003; Zweifel et al., 2009). An Ag/AgCl reference electrode was  
628 affixed in the superficial cortex. A carbon-fiber microelectrode was placed in the dorsal striatum  
629 (-2.3 DV), and during implantation the carbon-fiber was cycled at 60 Hz to allow the electrode to  
630 equilibrate and switched to 10 Hz ~20 min prior to data acquisition. A twisted bipolar stimulating  
631 electrode (Plastics One, Roanoke, VA, USA) connected to a DS4 Biphasic Constant Current  
632 Stimulus Isolator (Digitimer) was lowered in 0.1-mm increments starting at -1.5 DV into PPTg  
633 until robust dopamine increases were detected in the dorsal striatum. Stimulus trains consisted of  
634 60 biphasic pulses delivered at 60 Hz at a current of 400-600 µA and was synchronized with  
635 recordings so that sampling and stimulation did not overlap. Stimulation intensity varied across  
636 subjects to elicit robust dopamine release but was fixed at the beginning of data collection and did  
637 not alter thereafter. Once stable dopamine release was detected, a fiber optic cable was inserted  
638 above SNc (-2.0 DV) to target patch terminals and was incrementally lowered to optimize  
639 placement (see Figure 6A for graphic of experimental design). Optogenetic stimulation consisted  
640 of 1 sec pulses of blue laser light delivered at 5-10 mW. Three trial types were then conducted: 1.  
641 Electrical stimulation of PPTg alone (“E stim” trials), 2. Optogenetic stimulation of patch terminals  
642 in SNc (“Opto” trials), or 3. Simultaneous electrical stimulation of pedunculopontine tegmental  
643 nucleus and optogenetic activation of patch terminals (“Both” trials). The order of trials was  
644 selected randomly until one of each trial type had been collected, then this process was repeated a  
645 minimum of 3 times. All recordings were separated by at least 3 minutes to avoid neurotransmitter  
646 vesicle depletion.

647

### 648 **Histology and Microscopy**

649 At the cessation of all behavioral tests, mice were deeply anesthetized with isoflurane (4%, 2 l/min  
650 O<sub>2</sub>) and transcardially perfused with 0.9% saline and 4% paraformaldehyde (PFA). Brains were  
651 removed and allowed to post-fix in 4% PFA at 4°C for at least 24 h. Brains were then transferred

652 to a 30% sucrose solution and returned to 4°C for at least 48 h. Brains were sectioned on a freezing  
653 microtome into 20 µm sections. A subset of striatal sections from optogenetic experiments were  
654 mounted and imaged to determine ChR2 expression. A separate set of sections from Sepw1-NP67  
655 mice were washed 3X in Tris buffered saline (TBS) and blocked in 3% horse serum and 0.25%  
656 Triton X-100 prior to antibody staining. Sections were then incubated in a 1:500 dilution of anti-  
657 µ-opioid receptor polyclonal rabbit antibody (Immunostar, cat #24216) for 24–48 h at 4°C. A  
658 separate set of tissue was procured from Sepw1-NP67 mice crossed to a Cre-dependent GFP-  
659 reporter line to characterize Cre expression. This tissue was processed as described above, but was  
660 incubated in a 1:500 dilution of anti-µ-opioid receptor polyclonal rabbit antibody (Immunostar, cat  
661 #24216) and anti-GFP polyclonal guinea pig antibody (Synaptic Systems, cat#132–004) for 24–  
662 48 h at 4°C. Tissue was visualized using a Leica DM4000B fluorescent microscope or a Zeiss LSM  
663 880 confocal microscope.

664

### 665 **Data Analysis**

666 Mean and normalized press and head entry rates were compared across training and probe trials.  
667 As press rates in mice with lesioned patches have been shown to be variable across training days  
668 (Nadel), press and entry rates were normalized to average response rate across all VI60 trials to  
669 compare to probe trials. Omission and laser probe press and entry rates were normalized to the  
670 reinstatement VI60 training before each probe trial. We expected potentially opposing effects of  
671 modulating differing terminal sites, but across VI60 training, devaluation probe trials, omission,  
672 laser probe trials, open field, and place preference tasks we noted no statistical differences between  
673 different fiber optic implantation sites in ChR2 groups (Supporting Figures 1-5), therefore, groups  
674 were collapsed and comparisons were made between ChR2 mice and YFP controls. The ratio of  
675 time spent in active:inactive chambers was averaged across two days of the place preference task  
676 and then averaged across groups. Velocity in the open field was calibrated from megapixels/frame  
677 to cm/sec using Matlab software MATLAB (R2018b, Mathworks). Press and entry rates were  
678 calculated using Excel (Microsoft). Autocorrelations, cross-correlations, and real-time press and  
679 entry rates in laser probes, were determined using custom scripts written in MATLAB (R2018b,  
680 Mathworks). To control for individual differences in baseline responding and to determine laser-  
681 induced changes in responding, laser probe press and entry rates were subtracted from baseline  
682 responding 10 sec before laser onset before being averaged. To quantify responses in laser probe  
683 trials, response rate was averaged across 1 sec just prior to and 5-8.5 sec following laser onset.  
684 FSCV data was analyzed in HDCV (UNC Chemistry Department). Voltammetric current vs time  
685 and current vs. voltage traces were collected and averaged for each trial type within experiments  
686 (see above) before being averaged between subjects. Evoked amplitudes were normalized to  
687 maximum current in PPTg stimulation only trials ('E stim' trials) to account for different  
688 amplitudes of dopamine responses across subjects.

689

### 690 **Statistical Analysis**

691 Statistical analysis was performed by GraphPad Prism 7.04 (GraphPad) or Matlab (R2018b,  
692 Mathworks). Press and entry rates during VI60 and omission probes were compared using Two-  
693 Way Repeated Measures ANOVA with *post hoc* Sidak multiple comparison tests. Comparisons  
694 between stimulation sites, evoked dopamine responses, and sucrose consumption between groups  
695 were compared using One-Way ANOVA with *post hoc* Tukey's or Holm-Sidak multiple  
696 comparison's tests. Press rates in VI60, VI30, and devaluation probes, as well as time on  
697 stimulation side in place preference, baseline velocity, changes in velocity, and autocorrelations  
698 were compared using unpaired student's t-tests. Changes in press and entry rates in laser probe  
699 trials were compared using paired student's t-tests. Pearson's Correlation was utilized for all  
700 correlations. Statistical outliers were determined using the ROUT (robust regression followed by  
701 outlier identification) method (Q=0.5%) in GraphPad Prism 7.04 (GraphPad) and were removed  
702 prior to statistical analyses. Finally, mice lacking ostensible viral expression in the striatum were  
703 excluded prior to analysis. For all tests significance was defined as  $p \leq 0.05$ .

704

## 705 **Acknowledgements**

706 The authors would like to thank Drs. Charles Gerfen (National Institute of Mental Health) and  
707 Nathaniel Heintz (The Rockefeller University) for generously providing Sepw1 NP67 mice. This  
708 work was supported by NIH grant 1R15MH122729-01. J.A.N. was supported by the Nu Rho Psi  
709 Undergraduate Research Grant and the Robert Rich Student Research Grant through Oberlin  
710 College. Finally, the authors would also like to thank Lori Lindsay, Forrest Rose, Dorothy  
711 Auble, Gigi Knight, Bill Mohler, Chris Mohler and Laurie Holcomb for research support.

712

## 713 **Competing Interests**

714 The authors declare that no competing interests exist.

715

## 716 **References**

- 717 Adams CD, Dickinson A. 1981. Instrumental Responding following Reinforcer Devaluation. *The*  
718 *Quarterly Journal of Experimental Psychology Section B* **33**:109–121.  
719 doi:10.1080/14640748108400816
- 720 Balleine BW, Dickinson A. 1998. Goal-directed instrumental action: contingency and incentive  
721 learning and their cortical substrates. *Neuropharmacology* **37**:407–419.
- 722 Berridge KC, Whishaw IQ. 1992. Cortex, striatum and cerebellum: control of serial order in a  
723 grooming sequence. *Exp Brain Res* **90**:275–290. doi:10.1007/bf00227239
- 724 Bloem B, Huda R, Sur M, Graybiel AM. 2017. Two-photon imaging in mice shows striosomes  
725 and matrix have overlapping but differential reinforcement-related responses. *eLife* **6**.  
726 doi:10.7554/eLife.32353
- 727 Bucher ES, Brooks K, Verber MD, Keithley RB, Owesson-White C, Carroll S, Takmakov P,  
728 McKinney CJ, Wightman RM. 2013. Flexible Software Platform for Fast-Scan Cyclic  
729 Voltammetry Data Acquisition and Analysis. *Anal Chem* **85**:10344–10353.  
730 doi:10.1021/ac402263x

- 731 Cahill PS, Walker QD, Finnegan JM, Mickelson GE, Travis ER, Wightman RM. 1996.  
732 Microelectrodes for the Measurement of Catecholamines in Biological Systems. *Anal*  
733 *Chem* **68**:3180–3186. doi:10.1021/ac960347d
- 734 Canales JJ, Graybiel AM. 2000. A measure of striatal function predicts motor stereotypy. *Nat*  
735 *Neurosci* **3**:377–383. doi:10.1038/73949
- 736 Charnov EL. 1976. Optimal foraging, the marginal value theorem. *Theoretical Population*  
737 *Biology* **9**:129–136. doi:10.1016/0040-5809(76)90040-X
- 738 Colwill RM, Rescorla RA. 1985. Postconditioning devaluation of a reinforcer affects  
739 instrumental responding. *Journal of Experimental Psychology: Animal Behavior*  
740 *Processes* **11**:120–132. doi:10.1037/0097-7403.11.1.120
- 741 Compton D. 2004. Behavior strategy learning in rat: effects of lesions of the dorsal striatum or  
742 dorsal hippocampus. *Behavioural Processes* **67**:335–342. doi:10.1016/S0376-  
743 6357(04)00139-1
- 744 Crittenden JR, Graybiel AM. 2011. Basal Ganglia Disorders Associated with Imbalances in the  
745 Striatal Striosome and Matrix Compartments. *Frontiers in Neuroanatomy* **5**.  
746 doi:10.3389/fnana.2011.00059
- 747 Crittenden JR, Tillberg PW, Riad MH, Shima Y, Gerfen CR, Curry J, Housman DE, Nelson SB,  
748 Boyden ES, Graybiel AM. 2016. Striosome–dendron bouquets highlight a unique  
749 striatonigral circuit targeting dopamine-containing neurons. *Proceedings of the National*  
750 *Academy of Sciences* **113**:11318–11323. doi:10.1073/pnas.1613337113
- 751 Davis MI, Crittenden JR, Feng AY, Kupferschmidt DA, Naydenov A, Stella N, Graybiel AM,  
752 Lovinger DM. 2018. The cannabinoid-1 receptor is abundantly expressed in striatal  
753 striosomes and striosome-dendron bouquets of the substantia nigra. *PLOS ONE*  
754 **13**:e0191436. doi:10.1371/journal.pone.0191436
- 755 DePoy LM, Allen AG, Gourley SL. 2016. Adolescent cocaine self-administration induces habit  
756 behavior in adulthood: sex differences and structural consequences. *Transl Psychiatry*  
757 **6**:e875–e875. doi:10.1038/tp.2016.150
- 758 Dezfouli A, Balleine BW. 2013. Actions, action sequences and habits: evidence that goal-  
759 directed and habitual action control are hierarchically organized. *PLoS Comput Biol*  
760 **9**:e1003364. doi:10.1371/journal.pcbi.1003364
- 761 Dickinson A. 1985. Actions and Habits: The Development of Behavioural Autonomy.  
762 *Philosophical Transactions of the Royal Society B: Biological Sciences* **308**:67–78.  
763 doi:10.1098/rstb.1985.0010
- 764 Dolan RJ, Dayan P. 2013. Goals and Habits in the Brain. *Neuron* **80**:312–325.  
765 doi:10.1016/j.neuron.2013.09.007
- 766 Eblen F, Graybiel A. 1995. Highly restricted origin of prefrontal cortical inputs to striosomes in  
767 the macaque monkey. *J Neurosci* **15**:5999–6013. doi:10.1523/JNEUROSCI.15-09-  
768 05999.1995
- 769 Evans RC, Twedell EL, Zhu M, Ascencio J, Zhang R, Khaliq ZM. 2020. Functional Dissection  
770 of Basal Ganglia Inhibitory Inputs onto Substantia Nigra Dopaminergic Neurons. *Cell*  
771 *Reports* **32**:108156. doi:10.1016/j.celrep.2020.108156
- 772 Faure A, Haberland U, Condé F, El Massioui N. 2005. Lesion to the nigrostriatal dopamine  
773 system disrupts stimulus-response habit formation. *J Neurosci* **25**:2771–2780.  
774 doi:10.1523/JNEUROSCI.3894-04.2005
- 775 Fino E, Venance L. 2010. Spike-timing dependent plasticity in the striatum. *FrontSynaNeurosci*.  
776 doi:10.3389/fnsyn.2010.00006

- 777 Forster GL, Blaha CD. 2003. Pedunculopontine tegmental stimulation evokes striatal dopamine  
778 efflux by activation of acetylcholine and glutamate receptors in the midbrain and pons of  
779 the rat: PPT modulation of striatal dopamine release. *European Journal of Neuroscience*  
780 **17**:751–762. doi:10.1046/j.1460-9568.2003.02511.x
- 781 Freeze BS, Kravitz AV, Hammack N, Berke JD, Kreitzer AC. 2013. Control of Basal Ganglia  
782 Output by Direct and Indirect Pathway Projection Neurons. *Journal of Neuroscience*  
783 **33**:18531–18539. doi:10.1523/JNEUROSCI.1278-13.2013
- 784 Friedman A, Homma D, Bloem B, Gibb LG, Amemori K, Hu D, Delcasso S, Truong TF, Yang J,  
785 Hood AS, Mikofalvy KA, Beck DW, Nguyen N, Nelson ED, Toro Arana SE, Vorder  
786 Bruegge RH, Goosens KA, Graybiel AM. 2017. Chronic Stress Alters Striosome-Circuit  
787 Dynamics, Leading to Aberrant Decision-Making. *Cell* **171**:1191-1205.e28.  
788 doi:10.1016/j.cell.2017.10.017
- 789 Friedman A, Homma D, Gibb LG, Amemori K, Rubin SJ, Hood AS, Riad MH, Graybiel AM.  
790 2015. A Corticostriatal Path Targeting Striosomes Controls Decision-Making under  
791 Conflict. *Cell* **161**:1320–1333. doi:10.1016/j.cell.2015.04.049
- 792 Fujiyama F, Sohn J, Nakano T, Furuta T, Nakamura KC, Matsuda W, Kaneko T. 2011.  
793 Exclusive and common targets of neostriatofugal projections of rat striosome neurons: a  
794 single neuron-tracing study using a viral vector. *Eur J Neurosci* **33**:668–677.  
795 doi:10.1111/j.1460-9568.2010.07564.x
- 796 Geddes CE, Li H, Jin X. 2018. Optogenetic Editing Reveals the Hierarchical Organization of  
797 Learned Action Sequences. *Cell* **174**:32-43.e15. doi:10.1016/j.cell.2018.06.012
- 798 Gerfen CR. 1992. The neostriatal mosaic: multiple levels of compartmental organization. *Trends*  
799 *Neurosci* **15**:133–139.
- 800 Gerfen CR. 1985. The neostriatal mosaic. I. Compartmental organization of projections from the  
801 striatum to the substantia nigra in the rat. *J Comp Neurol* **236**:454–476.  
802 doi:10.1002/cne.902360404
- 803 Gerfen CR. 1984. The neostriatal mosaic: compartmentalization of corticostriatal input and  
804 striatonigral output systems. *Nature* **311**:461–464.
- 805 Gerfen CR, Paletzki R, Heintz N. 2013. GENSAT BAC Cre-Recombinase Driver Lines to Study  
806 the Functional Organization of Cerebral Cortical and Basal Ganglia Circuits. *Neuron*  
807 **80**:1368–1383. doi:10.1016/j.neuron.2013.10.016
- 808 Graybiel AM, Ragsdale CW. 1978. Histochemically distinct compartments in the striatum of  
809 human, monkeys, and cat demonstrated by acetylthiocholinesterase staining. *Proc Natl*  
810 *Acad Sci USA* **75**:5723–5726.
- 811 Gremel CM, Costa RM. 2013. Orbitofrontal and striatal circuits dynamically encode the shift  
812 between goal-directed and habitual actions. *Nature Communications* **4**.  
813 doi:10.1038/ncomms3264
- 814 Häusser M. 2014. Optogenetics: the age of light. *Nat Methods* **11**:1012–1014.  
815 doi:10.1038/nmeth.3111
- 816 Howard CD, Daberkow DP, Ramsson ES, Keefe KA, Garris PA. 2013. Methamphetamine-  
817 induced neurotoxicity disrupts naturally occurring phasic dopamine signaling. *Eur J*  
818 *Neurosci* **38**:2078–2088. doi:10.1111/ejn.12209
- 819 Howard CD, Keefe KA, Garris PA, Daberkow DP. 2011. Methamphetamine neurotoxicity  
820 decreases phasic, but not tonic, dopaminergic signaling in the rat striatum:  
821 Methamphetamine neurotoxicity reduces phasic dopamine. *Journal of Neurochemistry*  
822 **118**:668–676. doi:10.1111/j.1471-4159.2011.07342.x



- 823 Jenrette TA, Logue JB, Horner KA. 2019. Lesions of the Patch Compartment of Dorsolateral  
824 Striatum Disrupt Stimulus–Response Learning. *Neuroscience* **415**:161–172.  
825 doi:10.1016/j.neuroscience.2019.07.033
- 826 Jin X, Costa RM. 2010. Start/stop signals emerge in nigrostriatal circuits during sequence  
827 learning. *Nature* **466**:457–462. doi:10.1038/nature09263
- 828 Jin X, Tecuapetla F, Costa RM. 2014. Basal ganglia subcircuits distinctively encode the parsing  
829 and concatenation of action sequences. *Nature Neuroscience* **17**:423–430.  
830 doi:10.1038/nn.3632
- 831 Kravitz AV, Freeze BS, Parker PRL, Kay K, Thwin MT, Deisseroth K, Kreitzer AC. 2010.  
832 Regulation of parkinsonian motor behaviours by optogenetic control of basal ganglia  
833 circuitry. *Nature* **466**:622–626. doi:10.1038/nature09159
- 834 Lerner TN, Shilyansky C, Davidson TJ, Evans KE, Beier KT, Zalocusky KA, Crow AK,  
835 Malenka RC, Luo L, Tomer R, Deisseroth K. 2015. Intact-Brain Analyses Reveal  
836 Distinct Information Carried by SNc Dopamine Subcircuits. *Cell* **162**:635–647.  
837 doi:10.1016/j.cell.2015.07.014
- 838 Lopez-Huerta VG, Nakano Y, Bausenwein J, Jaidar O, Lazarus M, Cherasse Y, Garcia-Munoz  
839 M, Arbuthnott G. 2016. The neostriatum: two entities, one structure? *Brain Struct Funct*  
840 **221**:1737–1749. doi:10.1007/s00429-015-1000-4
- 841 Malvaez M, Greenfield VY, Matheos DP, Angelillis NA, Murphy MD, Kennedy PJ, Wood MA,  
842 Wassum KM. 2018. Habits Are Negatively Regulated by Histone Deacetylase 3 in the  
843 Dorsal Striatum. *Biol Psychiatry* **84**:383–392. doi:10.1016/j.biopsych.2018.01.025
- 844 McGregor MM, McKinsey GL, Girasole AE, Bair-Marshall CJ, Rubenstein JLR, Nelson AB.  
845 2019. Functionally Distinct Connectivity of Developmentally Targeted Striosome  
846 Neurons. *Cell Reports* **29**:1419-1428.e5. doi:10.1016/j.celrep.2019.09.076
- 847 Miyamoto Y, Katayama S, Shigematsu N, Nishi A, Fukuda T. 2018. Striosome-based map of the  
848 mouse striatum that is conformable to both cortical afferent topography and uneven  
849 distributions of dopamine D1 and D2 receptor-expressing cells. *Brain Struct Funct*  
850 **223**:4275–4291. doi:10.1007/s00429-018-1749-3
- 851 Morrison SE, Bamkole MA, Nicola SM. 2015. Sign Tracking, but Not Goal Tracking, is  
852 Resistant to Outcome Devaluation. *Front Neurosci* **9**. doi:10.3389/fnins.2015.00468
- 853 Murray RC, Gilbert YE, Logan AS, Hebbard JC, Horner KA. 2014. Striatal patch compartment  
854 lesions alter methamphetamine-induced behavior and immediate early gene expression in  
855 the striatum, substantia nigra and frontal cortex. *Brain Structure and Function* **219**:1213–  
856 1229. doi:10.1007/s00429-013-0559-x
- 857 Murray RC, Logan MC, Horner KA. 2015. Striatal patch compartment lesions reduce stereotypy  
858 following repeated cocaine administration. *Brain Research* **1618**:286–298.  
859 doi:10.1016/j.brainres.2015.06.012
- 860 Nadel JA, Pawelko SS, Copes-Finke D, Neidhart M, Howard CD. 2020. Lesion of striatal  
861 patches disrupts habitual behaviors and increases behavioral variability. *PLoS ONE*  
862 **15**:e0224715. doi:10.1371/journal.pone.0224715
- 863 Nelson A, Killcross S. 2006. Amphetamine exposure enhances habit formation. *J Neurosci*  
864 **26**:3805–3812. doi:10.1523/JNEUROSCI.4305-05.2006
- 865 O’Hare JK, Ade KK, Sukharnikova T, Van Hooser SD, Palmeri ML, Yin HH, Calakos N. 2016.  
866 Pathway-Specific Striatal Substrates for Habitual Behavior. *Neuron* **89**:472–479.  
867 doi:10.1016/j.neuron.2015.12.032

- 868 O'Hare JK, Li H, Kim N, Gaidis E, Ade K, Beck J, Yin H, Calakos N. 2017. Striatal fast-spiking  
869 interneurons selectively modulate circuit output and are required for habitual behavior.  
870 *Elife* **6**. doi:10.7554/eLife.26231
- 871 Prager E, Plotkin JL. 2018. Dopamine Oppositely Modulates Synaptic Integration in Striosome  
872 and Matrix Striatal Spiny Neurons. *SSRN Journal*. doi:10.2139/ssrn.3263630
- 873 Robbins TW, Everitt BJ. 1999. Drug addiction: bad habits add up. *Nature* **398**:567–570.  
874 doi:10.1038/19208
- 875 Robinson DL, Heien MLAV, Wightman RM. 2002. Frequency of Dopamine Concentration  
876 Transients Increases in Dorsal and Ventral Striatum of Male Rats during Introduction of  
877 Conspecifics. *J Neurosci* **22**:10477–10486. doi:10.1523/JNEUROSCI.22-23-10477.2002
- 878 Rode AN, Moghaddam B, Morrison SE. 2020. Increased Goal Tracking in Adolescent Rats Is  
879 Goal-Directed and Not Habit-Like. *Front Behav Neurosci* **13**:291.  
880 doi:10.3389/fnbeh.2019.00291
- 881 Rossi MA, Yin HH. 2012. Methods for Studying Habitual Behavior in Mice In: Crawley JN,  
882 Gerfen CR, Rogawski MA, Sibley DR, Skolnick P, Wray S, editors. *Current Protocols in*  
883 *Neuroscience*. Hoboken, NJ, USA: John Wiley & Sons, Inc.  
884 doi:10.1002/0471142301.ns0829s60
- 885 Schultz W. 1998. Predictive reward signal of dopamine neurons. *J Neurophysiol* **80**:1–27.  
886 doi:10.1152/jn.1998.80.1.1
- 887 Seiler JL, Cosme CV, Sherathiya VN, Bianco JM, Lerner TN. 2020. Dopamine Signaling in the  
888 Dorsomedial Striatum Promotes Compulsive Behavior (preprint). *Neuroscience*.  
889 doi:10.1101/2020.03.30.016238
- 890 Shillinglaw JE, Everitt IK, Robinson DL. 2014. Assessing behavioral control across reinforcer  
891 solutions on a fixed-ratio schedule of reinforcement in rats. *Alcohol* **48**:337–344.  
892 doi:10.1016/j.alcohol.2013.12.006
- 893 Shivkumar S, Muralidharan V, Chakravarthy VS. 2017. A Biologically Plausible Architecture of  
894 the Striatum to Solve Context-Dependent Reinforcement Learning Tasks. *Frontiers in*  
895 *Neural Circuits* **11**. doi:10.3389/fncir.2017.00045
- 896 Sieburg MC, Ziminski JJ, Margetts-Smith G, Reeve HM, Brebner LS, Crombag HS, Koya E.  
897 2019. Reward Devaluation Attenuates Cue-Evoked Sucrose Seeking and Is Associated  
898 with the Elimination of Excitability Differences between Ensemble and Non-ensemble  
899 Neurons in the Nucleus Accumbens. *eNeuro* **6**:ENEURO.0338-19.2019.  
900 doi:10.1523/ENEURO.0338-19.2019
- 901 Smith JB, Klug JR, Ross DL, Howard CD, Hollon NG, Ko VI, Hoffman H, Callaway EM,  
902 Gerfen CR, Jin X. 2016. Genetic-Based Dissection Unveils the Inputs and Outputs of  
903 Striatal Patch and Matrix Compartments. *Neuron* **91**:1069–1084.  
904 doi:10.1016/j.neuron.2016.07.046
- 905 Stephenson-Jones M, Yu K, Ahrens S, Tucciarone JM, van Huijstee AN, Mejia LA, Penzo MA,  
906 Tai L-H, Wilbrecht L, Li B. 2016. A basal ganglia circuit for evaluating action outcomes.  
907 *Nature* **539**:289–293. doi:10.1038/nature19845
- 908 Tricomi E, Balleine BW, O'Doherty JP. 2009. A specific role for posterior dorsolateral striatum  
909 in human habit learning. *European Journal of Neuroscience* **29**:2225–2232.  
910 doi:10.1111/j.1460-9568.2009.06796.x
- 911 Wallace ML, Saunders A, Huang KW, Philson AC, Goldman M, Macosko EZ, McCarroll SA,  
912 Sabatini BL. 2017. Genetically Distinct Parallel Pathways in the Entopeduncular Nucleus

- 913 for Limbic and Sensorimotor Output of the Basal Ganglia. *Neuron* **94**:138-152.e5.  
914 doi:10.1016/j.neuron.2017.03.017
- 915 Watabe-Uchida M, Eshel N, Uchida N. 2017. Neural Circuitry of Reward Prediction Error. *Annu*  
916 *Rev Neurosci* **40**:373–394. doi:10.1146/annurev-neuro-072116-031109
- 917 Watabe-Uchida M, Zhu L, Ogawa SK, Vamanrao A, Uchida N. 2012. Whole-Brain Mapping of  
918 Direct Inputs to Midbrain Dopamine Neurons. *Neuron* **74**:858–873.  
919 doi:10.1016/j.neuron.2012.03.017
- 920 White NM, Hiroi N. 1998. Preferential localization of self-stimulation sites in striosomes/patches  
921 in the rat striatum. *Proc Natl Acad Sci USA* **95**:6486–6491.
- 922 Willuhn I, Burgeno LM, Everitt BJ, Phillips PEM. 2012. Hierarchical recruitment of phasic  
923 dopamine signaling in the striatum during the progression of cocaine use. *Proceedings of*  
924 *the National Academy of Sciences* **109**:20703–20708. doi:10.1073/pnas.1213460109
- 925 Xiao X, Deng H, Furlan A, Yang T, Zhang X, Hwang G-R, Tucciarone J, Wu P, He M,  
926 Palaniswamy R, Ramakrishnan C, Ritola K, Hantman A, Deisseroth K, Osten P, Huang  
927 ZJ, Li B. 2020. A Genetically Defined Compartmentalized Striatal Direct Pathway for  
928 Negative Reinforcement. *Cell* **183**:211-227.e20. doi:10.1016/j.cell.2020.08.032
- 929 Yin HH. 2010. The sensorimotor striatum is necessary for serial order learning. *J Neurosci*  
930 **30**:14719–14723. doi:10.1523/JNEUROSCI.3989-10.2010
- 931 Yin HH, Knowlton BJ. 2006. The role of the basal ganglia in habit formation. *Nature Reviews*  
932 *Neuroscience* **7**:464–476. doi:10.1038/nrn1919
- 933 Yin HH, Knowlton BJ, Balleine BW. 2004. Lesions of dorsolateral striatum preserve outcome  
934 expectancy but disrupt habit formation in instrumental learning. *Eur J Neurosci* **19**:181–  
935 189.
- 936 Yin HH, Ostlund SB, Knowlton BJ, Balleine BW. 2005. The role of the dorsomedial striatum in  
937 instrumental conditioning: Striatum and instrumental conditioning. *European Journal of*  
938 *Neuroscience* **22**:513–523. doi:10.1111/j.1460-9568.2005.04218.x
- 939 Yoshizawa T, Ito M, Doya K. 2018. Reward-Predictive Neural Activities in Striatal Striosome  
940 Compartments. *eneuro* **5**:ENEURO.0367-17.2018. doi:10.1523/ENEURO.0367-17.2018
- 941 Yu C, Gupta J, Chen J-F, Yin HH. 2009. Genetic deletion of A2A adenosine receptors in the  
942 striatum selectively impairs habit formation. *J Neurosci* **29**:15100–15103.  
943 doi:10.1523/JNEUROSCI.4215-09.2009
- 944 Zweifel LS, Parker JG, Lobb CJ, Rainwater A, Wall VZ, Fadok JP, Darvas M, Kim MJ,  
945 Mizumori SJY, Paladini CA, Phillips PEM, Palmiter RD. 2009. Disruption of NMDAR-  
946 dependent burst firing by dopamine neurons provides selective assessment of phasic  
947 dopamine-dependent behavior. *Proceedings of the National Academy of Sciences*  
948 **106**:7281–7288. doi:10.1073/pnas.0813415106

949  
950  
951  
952  
953  
954  
955  
956

957 **Supporting Figures**

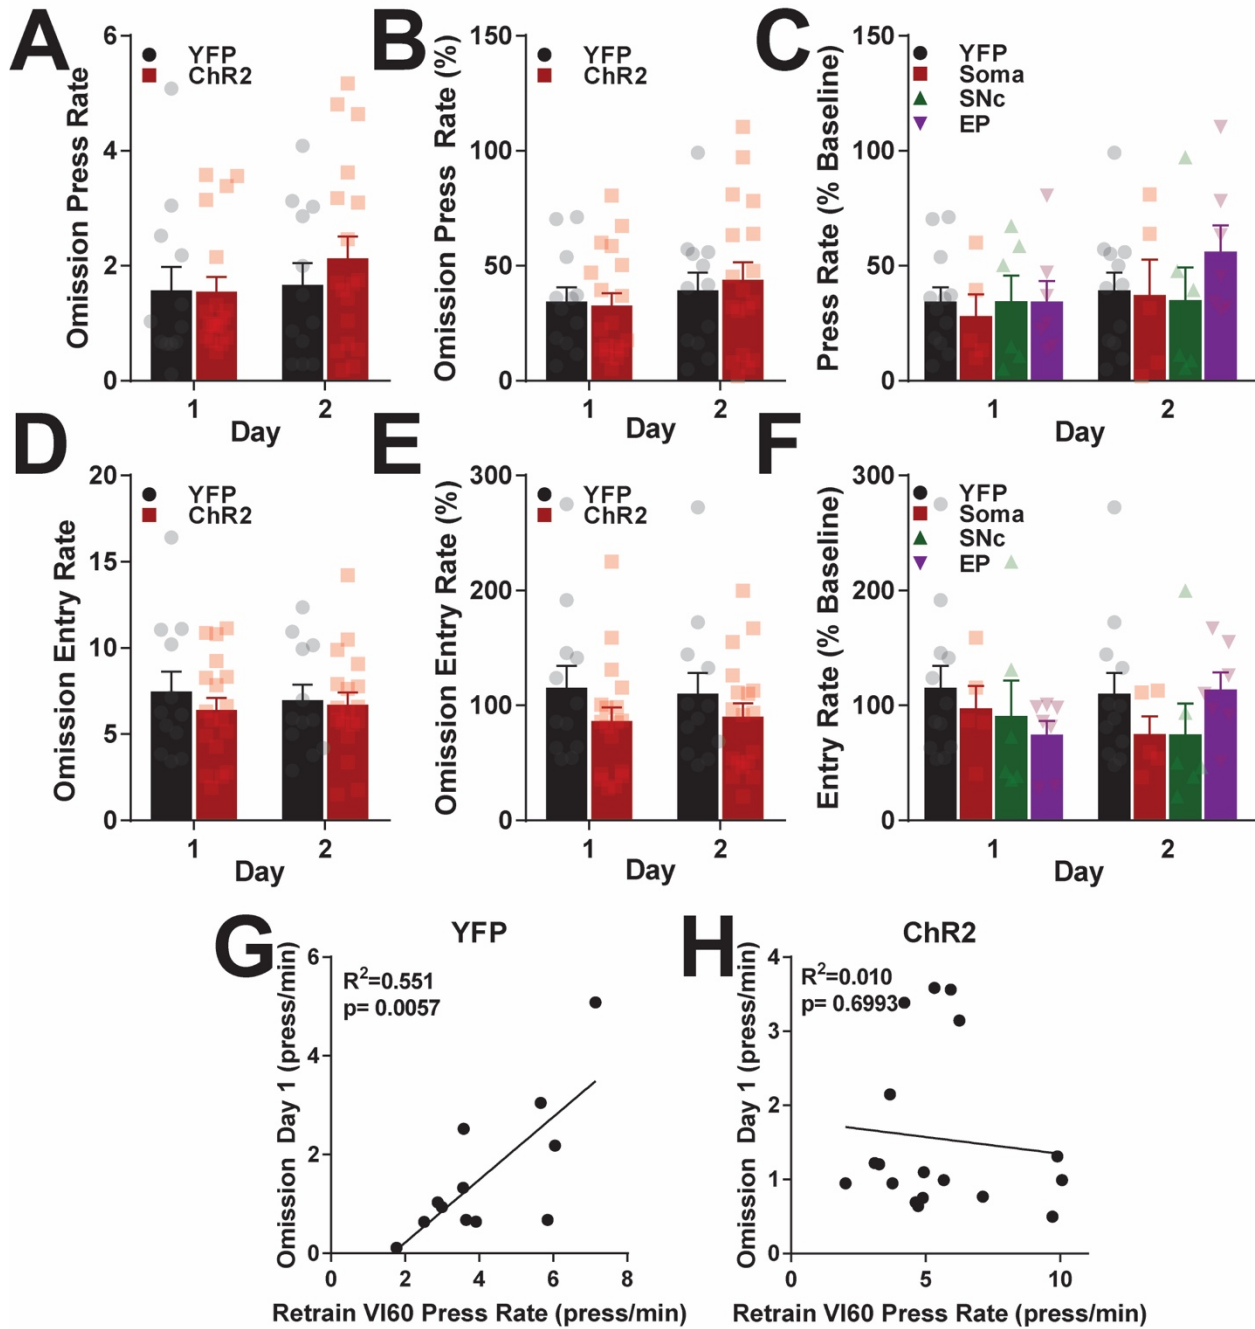

958  
959

960 **Supporting Figure 1. Effects of optogenetic patch stimulation during learning on omission.** A. Average press  
961 rates during omission probes for YFP control and ChR2 mice across days (two-way repeated measures ANOVA, no  
962 significant effects of time, group, or interaction). B. Average press rates normalized to responding during VI60  
963 retraining during omission probes (two-way repeated measures ANOVA, no significant effects of time, group, or  
964 interaction). C. Same data as B, but broken into fiber optic placement groups (two-way repeated measures ANOVA,  
965 significant effect of time,  $F_{(1,26)} = 4.56$ ,  $p = 0.042$ ), no significant effect of group or interaction). D. Average head  
966 entry rates during omission across days (two-way repeated measures ANOVA, no significant effects of time, group,  
967 or interaction). E. Average entry rates normalized to baseline entry rates in VI60 retraining (two-way repeated

968 measures ANOVA, no significant effects of time, group, or interaction). F. Same as E, but broken into fiber optic  
 969 placement groups (two-way repeated measures ANOVA, significant time x group interaction,  $F_{(3,26)} = 3.87$ ,  $p =$   
 970  $0.021$ , no significant *post hoc* Tukey tests). G-H. Correlation of omission press rate on day 1 vs. VI60 retraining day  
 971 immediately preceding omission for YFP (G) or ChR2 (H) mice. Data are mean  $\pm$  SEM.  
 972

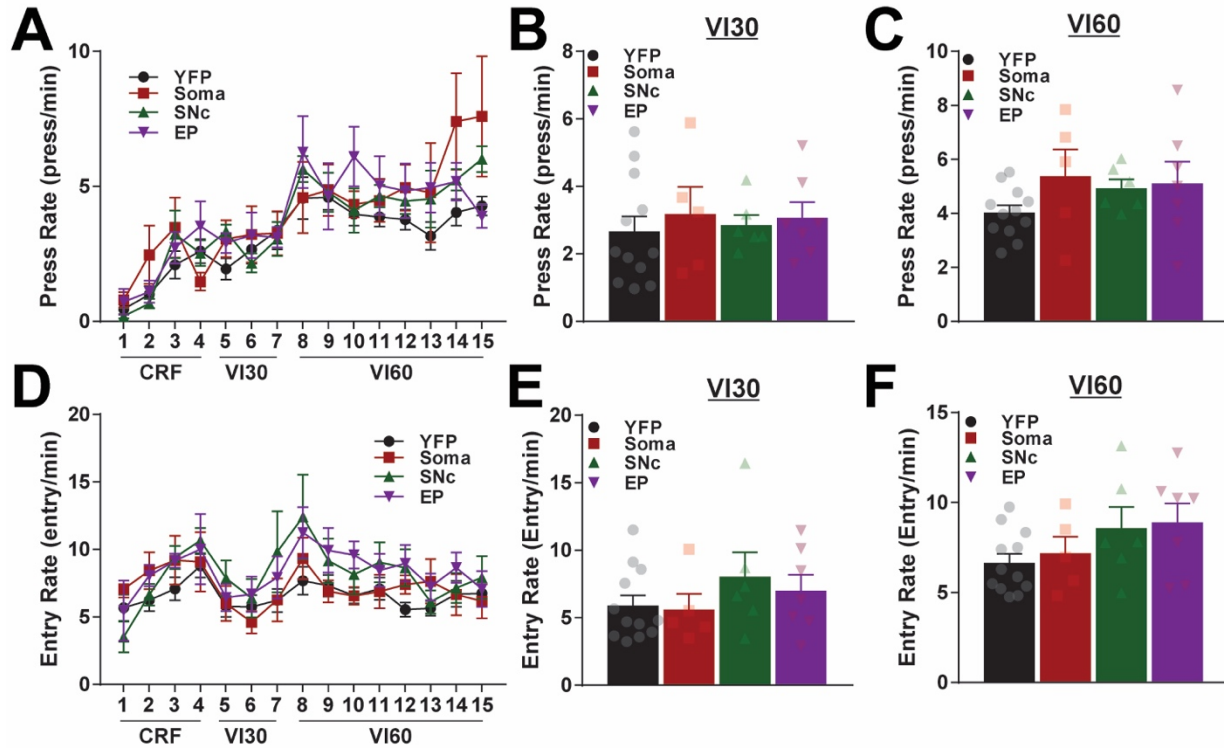

973  
 974  
 975 **Supporting Figure 2. Optogenetic patch stimulation during variable interval training by implantation site**  
 976 **group.** A. Average press rates across continuous reinforcement (CRF), variable interval 30 (VI30), and variable  
 977 interval 60 (VI60) training by day (two-way repeated measures ANOVA, significant effect of time,  $F_{(14,364)} = 21.98$ ,  
 978  $p < 0.0001$ , no significant effects of group or interaction). B-C. Average press rates across all VI30 (B; one-way  
 979 ANOVA,  $F_{(3,26)} = 0.21$ ,  $p = 0.89$ ) and VI60 (C; one-way ANOVA,  $F_{(3,26)} = 1.34$ ,  $p = 0.28$ ) days. D. Average head  
 980 entry rates across training by day (two-way repeated measures ANOVA, significant effect of time,  $F_{(14,364)} = 6.12$ ,  $p$   
 981  $< 0.0001$ , no significant effects of group or interaction). E-F. Average entry rate across all VI30 (E; one-way  
 982 ANOVA,  $F_{(3,26)} = 1.78$ ,  $p = 0.18$ ) and VI60 (F; one-way ANOVA,  $F_{(3,26)} = 0.79$ ,  $p = 0.51$ ) days.  
 983  
 984  
 985  
 986  
 987

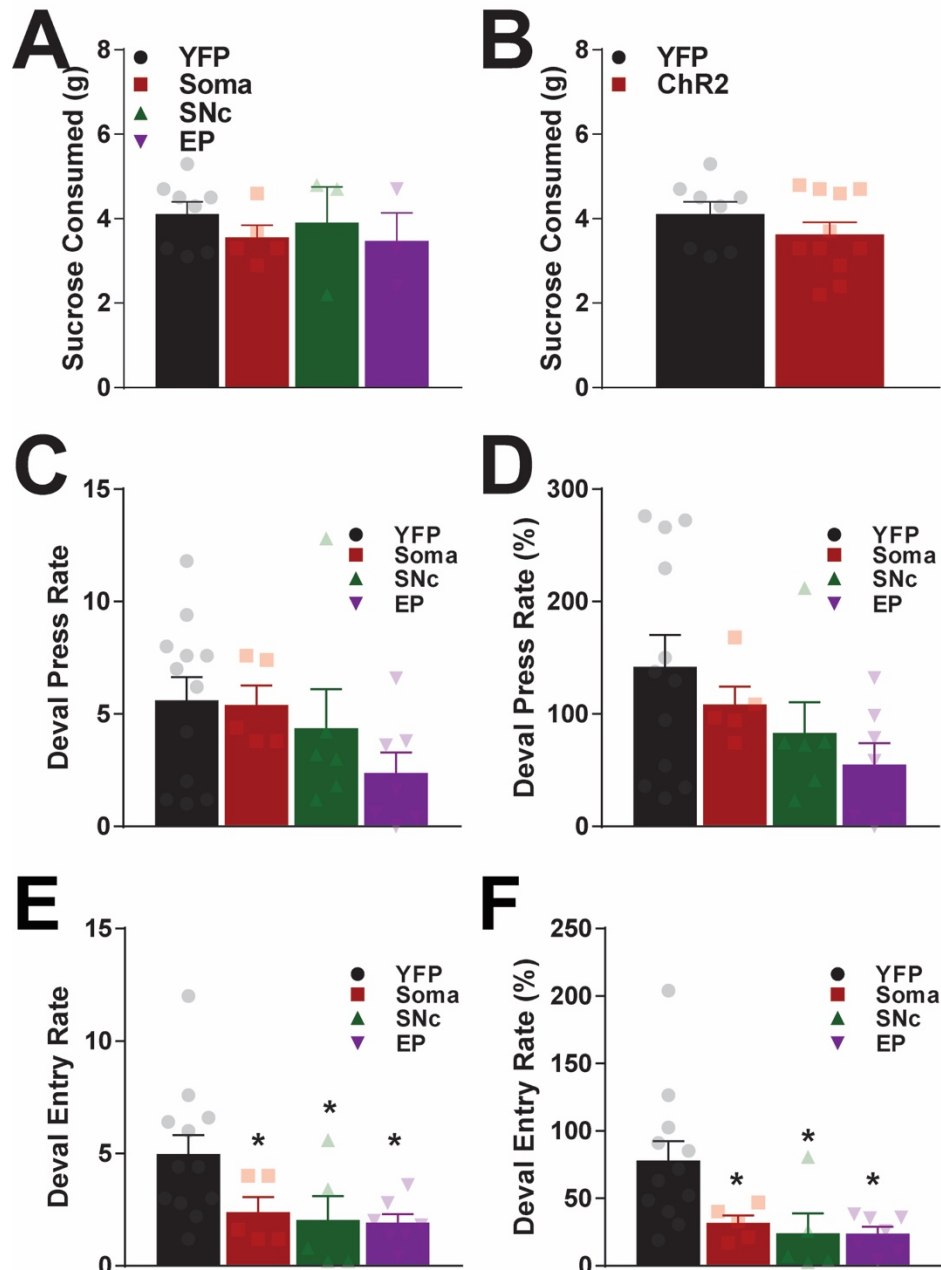

988  
989  
990  
991  
992  
993  
994  
995

**Supporting Figure 3. Sucrose consumed during free access and press and entry rates in devaluation by implantation site group.** A-B. Average sucrose consumed during 1h free access by implantation site group (A; one-way ANOVA,  $F_{(3,15)} = 0.531$ ,  $p = 0.67$ ) and collapsed into YFP/ChR2 groups (B; unpaired t-test,  $t_{17} = 1.17$ ,  $p = 0.26$ ). C-D. Average press rate (C; one-way ANOVA,  $F_{(3,26)} = 1.53$ ,  $p = 0.23$ ) and average press rates normalized to responding across VI60 training (D; one-way ANOVA,  $F_{(3,26)} = 2.17$ ,  $p = 0.12$ ). E-F. Average head entry rates (E; one-way ANOVA,  $F_{(3,25)} = 3.626$ ,  $p = 0.027$ ) and entry rates normalized to baseline VI60 responding (F; one-way ANOVA,  $F_{(3,25)} = 4.644$ ,  $p = 0.010$ ). Data are mean  $\pm$  SEM. \*significant Holm-Sidak *post hoc* test

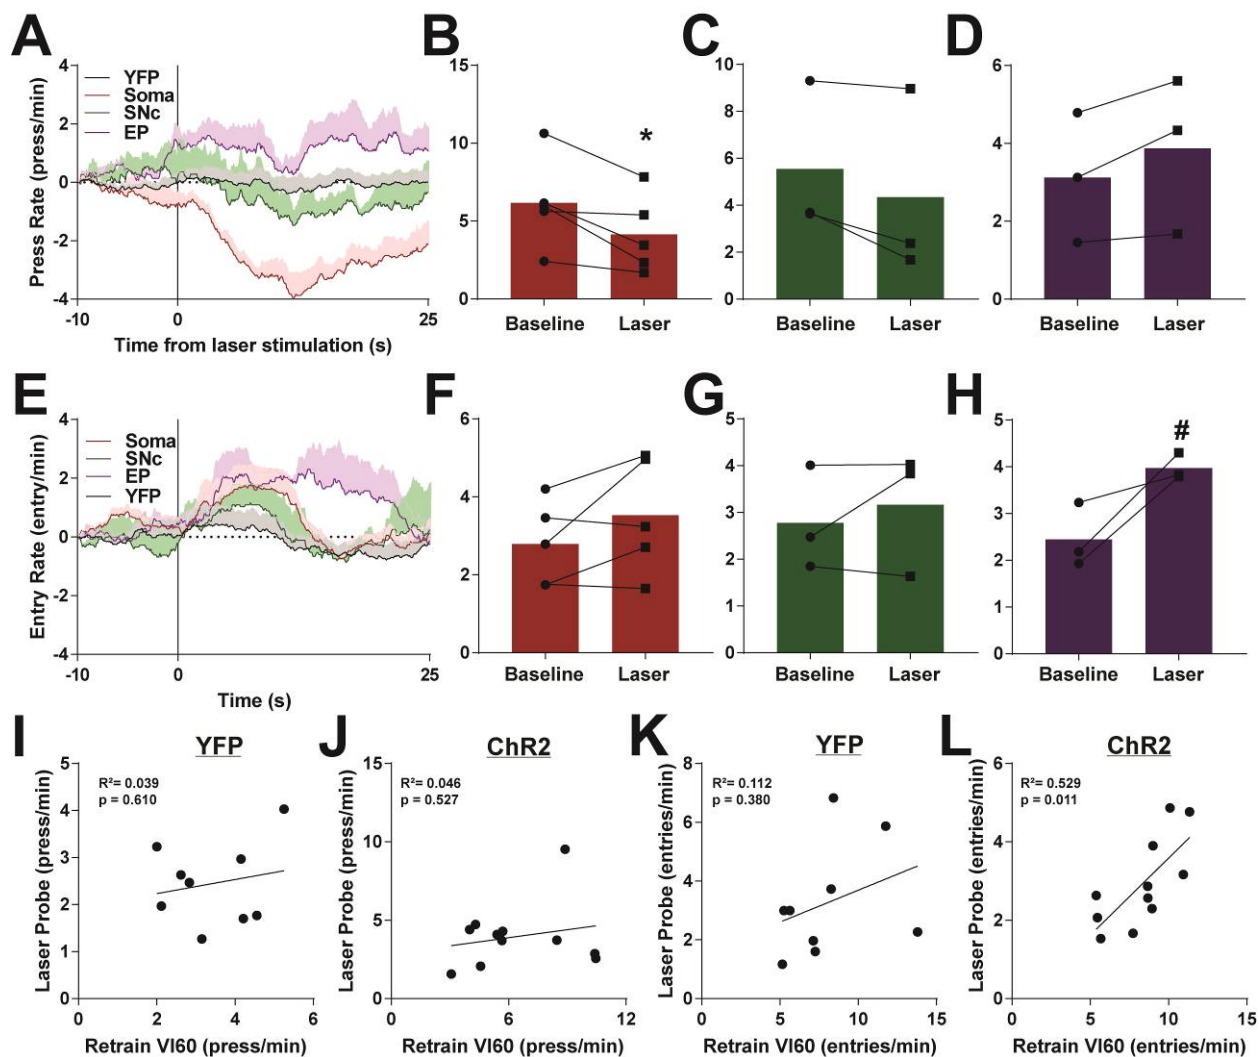

996  
997

998 **Supporting Figure 4. Effects of acute laser stimulation during laser probe trials by implantation site group.**  
 999 A. Average lever press rate before and after laser onset (vertical line; 3 sec, 5 Hz stimulation). B-D. Average press  
 1000 rates before and following laser onset for Soma (B; paired t-test,  $t_4 = 3.10$ ,  $p = 0.036$ ), SNc (C; paired t-test,  $t_2 = 2.48$ ,  
 1001  $p = 0.13$ ), and EP (D; paired t-test,  $t_2 = 2.58$ ,  $p = 0.12$ ) groups. E. Average head entry rates before and after laser  
 1002 onset. F-H. Average entry rates before and after laser onset for Soma (F; paired t-test,  $t_4 = 1.69$ ,  $p = 0.17$ ), SNc (G;  
 1003 paired t-test,  $t_2 = 0.78$ ,  $p = 0.51$ ), and EP (H; paired t-test,  $t_2 = 3.24$ ,  $p = 0.084$ ) groups. I-J. Correlation of lever press  
 1004 rates during laser probe trials and VI60 retraining the day before for YFP (I) and ChR2 (J) mice. K-L. Correlation of  
 1005 head entry rates during laser probe and VI60 retraining for YFP (K) and ChR2 (L) mice. Data are mean  $\pm$  SEM. # $P$   
 1006  $< 0.1$   
 1007  
 1008  
 1009

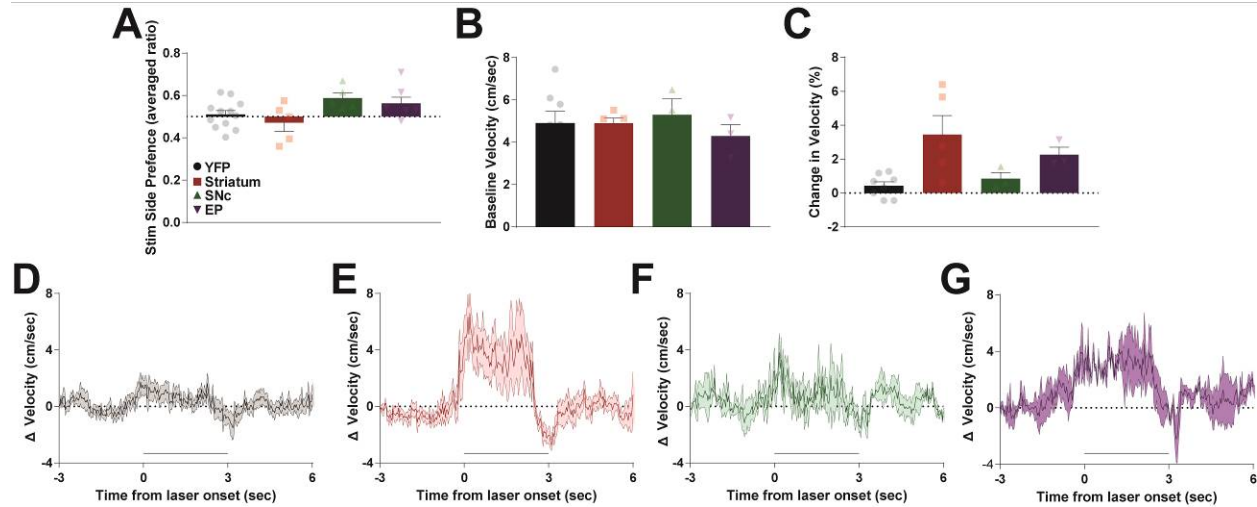

1010  
1011  
1012  
1013  
1014  
1015  
1016  
1017  
1018  
1019  
1020

**Supporting Figure 5. Effects of optogenetic stimulation of patches on reinforcement and locomotion by implantation site groups.** A. Time spent on stimulated side of a two-chamber place preference apparatus. Stimulation side was counterbalanced across two days and averaged between days (one-way ANOVA,  $F_{(3,25)} = 3.023$ ,  $p = 0.048$ , no significant *post hoc* Holm-Sidak tests). B. Baseline velocity in open field (one-way ANOVA,  $F_{(3,15)} = 0.33$ ,  $p = 0.80$ ). C. Change in velocity following laser onset in open field (one-way ANOVA,  $F_{(3,15)} = 5.22$ ,  $p = 0.012$ , no significant *post hoc* Holm-Sidak tests). D-E. Average baseline normalized velocity before and after laser onset (5 Hz, 3 sec; denoted by thick black line) for YFP (D), Soma (E), SNc (F), and EP (G) mice. Data are mean  $\pm$  SEM.

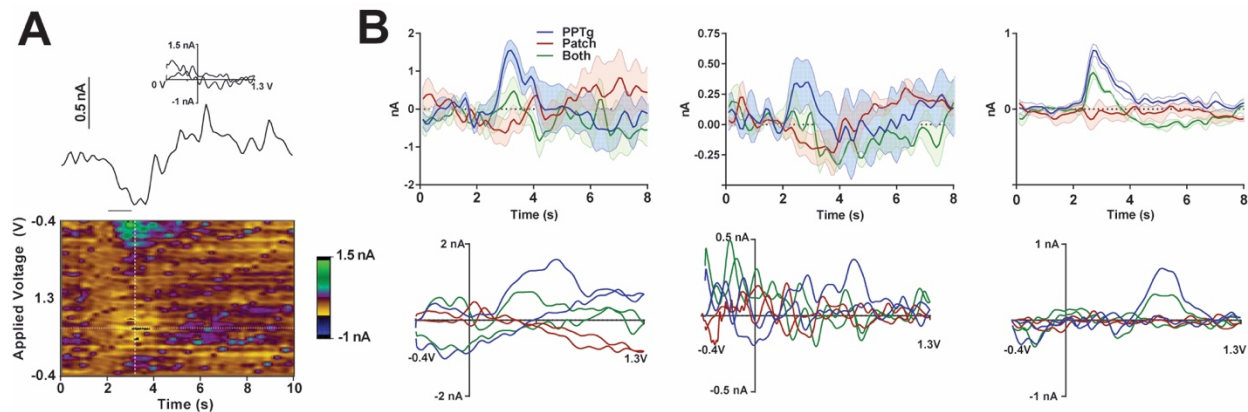

1021  
1022  
1023  
1024  
1025  
1026  
1027  
1028  
1029

**Supporting Figure 6. Average data from each replicate in FSCV experiments.** A. Representative decrease in current recorded during an "opto" trial (stimulation of patch terminals only). The line shows recorded current relative to stimulation delivery (straight line below current trace) above a pseudo-color plot. The color plot shows current collected (in color) at each waveform scan (y-axis) and across time (x-axis). INSET: a "cyclic voltammogram" collected at the vertical white dotted line on the pseudo-color plot. B. Average current (top) and cyclic voltammograms (bottom) recorded across three trials for each of the three stimulation conditions. Each current and cyclic voltammogram plot is from an individual FSCV experiment.
